# Supplementary material
Source: publisher figshare collection journal article supplement (https://brill.figshare.com/articles/dataset/_/28607966)
Supplement: Supplementary file 1 [file 1]

## Sheet: Berothella
Supplementary material 1. Distribution data of species of Berothella
	current name	continent	country	province / state / prefecture	location	coordinate		collection		citation	titel (short version)
1	Berothella falcata Zheng & Liu, 2021	ASI	China	Zhejiang	Lishui City, Longquan County, Mt. Longquanshan	27.89°N	119.18°E	CAU	Beijing	Zheng & Liu, 2021	First record of female pleasing lacewings of Berothellinae from China
2	Berothella holzschuhi U. Aspöck, Liu & H. Aspöck, 2017	ASI	Laos	Phongsaly	Umgebung	21.69°N	102.10°E	CHRR	Scheibbs	Liu et al., 2017	Phylogeny of pleasing lacewings
3	Berothella phantoma Banks, 1934	ASI	Malaysia	Selangor	Bukit Kutu Mountains	3.55°N	101.72°E	BNHM	London	Oswald, 1998	Annotated Catalogue of the Dilaridae
4	Berothella pretiosa Banks, 1939	ASI	China	Hainan	Ta-han	21.69°N	102.10°E	MCZ	Cambridge	Oswald, 1998	Annotated Catalogue of the Dilaridae
5	Berothella weiweii Liu & Li, 2021	ASI	Malaysia	Sabah	Jungle Girl Camp	19.16°N	109.70°E	CAU	Beijing	Liu & Li, 2021	Berothella discovered from Borneo
6	Berothella wenii Zheng & Liu, 2021	ASI	China	Taiwan	Taitung County, Haiduan Township, Siangyang National Forest Recreation Area	22.69°N	102.99°E	CAU	Beijing	Zheng & Liu, 2021	First record of female pleasing lacewings of Berothellinae from China

## Sheet: Dilar
Supplementary file 1. Distribution data of species of Dilar
	current name	continent	country	province / state / prefecture	location	coordinate		collection		citation	titel (short version)
1	Dilar abnormis Zhang, Liu & Winterton in Zhang et al., 2016	ASI	Thailand	Chiang Mai	Doi Inthanon NP, Checkpoint 2	18.52°N	98.48°E	CAU	Beijing	Zhang et al., 2016	Dilar from Southeast Asia
1	Dilar abnormis Zhang, Liu & Winterton in Zhang et al., 2016	ASI	Thailand	Chiang Mai	Doi Inthanon NP, Checkpoint 2			CSCA	Sacramento	Zhang et al., 2016	Dilar from Southeast Asia
2	Dilar algericus Navás, 1909 (nomen dubium)	AFR	Algeria	Alger	Alger [=Algiers, =Argel (Spanish)	36.83°N	3°E	MNHN	Paris	Oswald, 1998	Catalogue of the Dilaridae
3	Dilar anatolicus U. Aspöck, Liu & H. Aspöck, 2015	ASI	Turkey	Ankara	Kizilçahamam [a district of Ankara Prov.]	40.47°N	32.63°E	HUAC	Vienna	Aspöck, U. et al, 2015	The Dilaridae of the Balkan Peninsula and of Anatolia
3	Dilar anatolicus U. Aspöck, Liu & H. Aspöck, 2015	ASI	Turkey	Ankara	Kizilcahamam [a district of Ankara Prov.]			CHRR	Scheibbs	Aspöck, U. et al, 2015	The Dilaridae of the Balkan Peninsula and of Anatolia
3	Dilar anatolicus U. Aspöck, Liu & H. Aspöck, 2015	ASI	Turkey	Bursa	Uludağ [Mountain]	40.12°N	29.04°E	HUAC	Vienna	Aspöck, U. et al, 2015	The Dilaridae of the Balkan Peninsula and of Anatolia
3	Dilar anatolicus U. Aspöck, Liu & H. Aspöck, 2015	ASI	Turkey	Mersin	Icel, Kilik. Taurus, Namrum [a town of Toroslar Dist., Mersin Prov.	37.03°N	34.46°E	HUAC	Vienna	Aspöck, U. et al, 2015	The Dilaridae of the Balkan Peninsula and of Anatolia
3	Dilar anatolicus U. Aspöck, Liu & H. Aspöck, 2015	ASI	Turkey	Mersin	Icel, Kilik. Taurus, Namrum [a town of Toroslar Dist., Mersin Prov.			CHRR	Scheibbs	Aspöck, U. et al, 2015	The Dilaridae of the Balkan Peninsula and of Anatolia
3	Dilar anatolicus U. Aspöck, Liu & H. Aspöck, 2015	ASI	Syria		Ehrenberg/Lidar turcicus, Hag/388/Type [The word Type on the old label is wrong]	35.45°N	39.14°E	MFN	Berlin	Aspöck, U. et al, 2015	The Dilaridae of the Balkan Peninsula and of Anatolia
4	Dilar aspoeckorum Martins, Flint & Liu, 2018	ASI	Vietnam	Cao Bang	Phja-Den environs	22.53°N	105.87°E	NMNH	Washington	Martins et al., 2018	Notes on pleasing lacewing genus Dilar Rambur
5	Dilar austroindicus Li, U. Aspöck, H. Aspöck & Liu, 2020	ASI	India	Tamil Nadu	Alagar Hills, 21km. N[orth]. Madurai	9.9°N	78.12°E	CASC	San Francisco	Li et al., 2020	Dilar from South Asia
6	Dilar bifurcatus Zhang, Liu, H. Aspöck & U. Aspöck, 2015	ASI	China	Jiangxi	Jiujiang City, Mt. Lushan [九江市庐山]	29.55°N	115.97°E	CAU	Beijing	Zhang et al., 2015	Dilar from Southern China
7	Dilar biprojectus Li, U. Aspöck, H. Aspöck & Liu, 2020	ASI	India	Maharashtra	5km. SW Mahabaleshwar	17.93°N	73.64°E	CASC	San Francisco	Li et al., 2020	Dilar from South Asia
8	Dilar bolivari Navás, 1903	AFR	Algeria	Oran	Oran	35.75°N	0.63°E	MNCNM	Madrid	Monserrat, 1988a	Revision de la obra de L. Navás, I
8	Dilar bolivari Navás, 1903	AFR	Algeria	Tissemsilt	Teniet el Haad [Théniet El Had]	35.58°N	2.03°E	MNM	Budapest	Klapálek, 1917	Über die v. H. Prof. A. Hetschko in Korsika ges. Neuropteroiden
8	Dilar bolivari Navás, 1903	AFR	Tunisia	Gafsa	Gafsa	34.56°N	8.13°E			Navás, 1926	Insectos exóticos Neurópteros y afines
9	Dilar caesarulus H. Aspöck & U. Aspöck, 1967	ASI	Afghanistan	Ghazni	125 km SW v. Ghazni [city]	33.54°N	68.41°E	HUAC	Vienna	Aspöck, H. & Aspöck, U., 1967	Neue Dilariden aus Asien (Neuroptera, Planipennia)
9	Dilar caesarulus H. Aspöck & U. Aspöck, 1967	ASI	Afghanistan	Parwan / Kabul	Salang Paβ, Nordseite	34.94°N	69.34°E	HUAC	Vienna	Li et al., 2019	Dilar from the Central Asia
10	Dilar cangyuanensis Li, H. Aspöck, U. Aspöck & Liu, 2021	ASI	China	Yunnan	Cangyuan, Nangunhe National Nature Reserve, Wengding Conservation Station [南滚河自然保护区翁丁保护站]	23.15°N	99.25°E	CAU	Beijing
11	Dilar chebalingensis Zhang, Liu, H. Aspöck & U. Aspöck, 2015	ASI	China	Guangdong	Shixing County, Chebaling [始兴县车八岭]	24.67°N	114.15°E	CAU	Beijing	Zhang et al., 2015	Dilar from Southern China
11	Dilar chebalingensis Zhang, Liu, H. Aspöck & U. Aspöck, 2015	ASI	China	Hunan	Changde [City], Mt. Hupingshan [常德市壶瓶山]	29.93°N	110.77°E	CAU	Beijing	Zhang et al., 2015	Dilar from Southern China
12	Dilar clavatus Li, U. Aspöck, H. Aspöck & Liu, 2020	ASI	Sri Lanka	North Central	Anu[radhapura] Dist[rict]. Irrigation Bungalow Padaviya	8.84°N	80.76°E	PCWH	Farnham	Li et al., 2020	Dilar from South Asia
12	Dilar clavatus Li, U. Aspöck, H. Aspöck & Liu, 2020	ASI	Sri Lanka	North Central	Anu[radhapura] Dist[rict]. Wildlife Soc. Bungalow Hunuwilagama, Wilpattu	8.41°N	80.13°E	PCWH	Farnham	Li et al., 2020	Dilar from South Asia
13	Dilar cornutus Zhang, Liu, H. Aspöck & U. Aspöck, 2015	ASI	China	Yunnan	Longling County, Mt. Xiaoheishan [龙陵县小黑山]	24.55°N	98.82°E	CAU	Beijing	Zhang et al., 2016	Dilar from Southern China
13	Dilar cornutus Zhang, Liu, H. Aspöck & U. Aspöck, 2015	ASI	China	Yunnan	Lancang County [澜沧县]	22.26°N	100.07°E	CAU	Beijing
13	Dilar cornutus Zhang, Liu, H. Aspöck & U. Aspöck, 2015	ASI	China	Yunnan	Baoshan City, Nankang Village, Gaoligong Natural Park [保山赧亢村高黎贡自然公园]	24.84°N	98.8°E	CAU	Beijing
13	Dilar cornutus Zhang, Liu, H. Aspöck & U. Aspöck, 2015	ASI	China	Yunnan	Baoshan City, Baihualing Village, Guxing [保山百花岭古星寨]	25.07°N	98.48°E	CAU	Beijing
13	Dilar cornutus Zhang, Liu, H. Aspöck & U. Aspöck, 2015	ASI	Thailand	Chiang Mai	Doi Inthanon	18.59°N	98.49°E	HUAC	Vienna
14	Dilar corsicus Navás, 1909	EUR	France	Corsica	La Foca [=?Foce]	41.63°N	9.07°E	BNHM	London	Navás, 1909	Monografía de la familia de los Diláridos
14	Dilar corsicus Navás, 1909	EUR	France	Corsica	Vizzavona [Village]	42.13°N	9.13°E			Klapalek, 1917	Über die v. H. Prof. A. Hetschko in Korsika ges. Neuropteroiden
14	Dilar corsicus Navás, 1909	EUR	France	Corsica	Vizzavona [Village]			MNCNM	Madrid	Monserrat, 1988a	Revision de la obra de L. Navás, I
15	Dilar daweishanensis Li, H. Aspöck, U. Aspöck & Liu, 2021	ASI	China	Yunnan	Pingbian, Daweishan Forest Park [大围山森林公园]	22.91°N	103.43°E	CAU	Beijing
16	Dilar dissimilis Navás, 1903	EUR	Spain	Andalucía	Andalucía (region)	37.32°N	5.2°W	MNHN	Paris	Monserrat, 1988a	Revision de la obra de L. Navás, I
16	Dilar dissimilis Navás, 1903	EUR	Spain	Andalucía	Puerto de Jumilla	37.38°N	5.95°W	VM	Madrid	Monserrat, 1988a	Revision de la obra de L. Navás, I
16	Dilar dissimilis Navás, 1903	EUR	Spain	Aragon	Teruel [City]	40.41°N	1.44°W	MNCNM	Madrid	Monserrat, 1988a	Revision de la obra de L. Navás, I
16	Dilar dissimilis Navás, 1903	EUR	Spain	Aragon	Teruel [City], Albarracín [Town]			NHMB	Basel	Monserrat, 1988a	Revision de la obra de L. Navás, I
16	Dilar dissimilis Navás, 1903	EUR	Spain	Aragon	Teruel [City], Albarracín [Town]			VM	Madrid	Monserrat, 1988a	Revision de la obra de L. Navás, I
16	Dilar dissimilis Navás, 1903	EUR	Spain	Aragon	Teruel [City], Albarracín [Town], Fuente de la Señora			VM	Madrid	Monserrat, 2005	Nuevos datos sobre algunas pequeñas familias de neurópteros
16	Dilar dissimilis Navás, 1903	EUR	Spain	Aragon	Zaragoza	41.47°N	1.07°W	MNHN	Paris	Monserrat, 2014	Los diláridos de la Península Ibérica
16	Dilar dissimilis Navás, 1903	EUR	Spain	Aragon	Zaragoza, Muel [municipality]			MNHN	Paris	Monserrat, 1988a	Revision de la obra de L. Navás, I
16	Dilar dissimilis Navás, 1903	EUR	Spain	Aragon	Zaragoza, Muel [municipality]			MNHN	Paris	Monserrat, 2014	Los diláridos de la Península Ibérica
16	Dilar dissimilis Navás, 1903	EUR	Spain	Aragon	Zaragoza, Pina de Ebro, Retuerta de Pina	41.49°N	0.53°W	VM	Madrid	Monserrat, 2005	Nuevos datos sobre algunas pequeñas familias de neurópteros
16	Dilar dissimilis Navás, 1903	EUR	Spain	Aragon	Zaragoza, Pina de Ebro, Retuerta de Pina			VM	Madrid	Monserrat, 2005	Nuevos datos sobre algunas pequeñas familias de neurópteros
16	Dilar dissimilis Navás, 1903	EUR	Spain	Aragon	Zaragoza, Pina de Ebro, Retuerta de Pina			VM	Madrid	Monserrat, 2005	Nuevos datos sobre algunas pequeñas familias de neurópteros
16	Dilar dissimilis Navás, 1903	EUR	Spain	Aragon	Zaragoza, Pina de Ebro, Retuerta de Pina			VM	Madrid	Monserrat, 2005	Nuevos datos sobre algunas pequeñas familias de neurópteros
16	Dilar dissimilis Navás, 1903	EUR	Spain	Aragon	Zaragoza, Pina de Ebro, Retuerta de Pina			VM	Madrid	Monserrat, 2005	Nuevos datos sobre algunas pequeñas familias de neurópteros
16	Dilar dissimilis Navás, 1903	EUR	Spain	Aragon	Zaragoza, Pina de Ebro (La Retuerta)			UAH	Madrid	Marín & Monserrat, 1995	Contribución al conocimiento de los neurópteros de Zaragoza
16	Dilar dissimilis Navás, 1903	EUR	Spain	Aragon	[Zaragoza] Veruela	41.82°N	1.69°W	MNHN	Paris	Monserrat, 1988a	Revision de la obra de L. Navás, I
16	Dilar dissimilis Navás, 1903	EUR	Spain	Andalucía	Granada, Sierra de Alfacar	37.26°N	3.52°W	BNHM	London	Monserrat, 1988a	Revision de la obra de L. Navás, I
16	Dilar dissimilis Navás, 1903	EUR	Spain	Andalucía	Granada, Venta del Fraile	36.98°N	3.72°W	VM	Madrid	Monserrat, 1988a	Revision de la obra de L. Navás, I
16	Dilar dissimilis Navás, 1903	EUR	Spain	Madrid	Aranjuez	40.03°N	3.61°W	VM	Madrid	Monserrat, 1988a	Revision de la obra de L. Navás, I
16	Dilar dissimilis Navás, 1903	EUR	Spain	Madrid	Campo Real	40.34°N	3.38°W	VM	Madrid	Monserrat, 1988a	Revision de la obra de L. Navás, I
16	Dilar dissimilis Navás, 1903	EUR	Spain	Madrid	Monte Regajal, Aranjuez	40.00°N	3.60°W	VM	Madrid	Monserrat, 1988a	Revision de la obra de L. Navás, I
16	Dilar dissimilis Navás, 1903	EUR	Spain	Madrid	Rivas Vaciamadrid [City], Cerro del Telégrafo	40.69°N	4°W	VM	Madrid	Monserrat, 2005	Nuevos datos sobre algunas pequeñas familias de neurópteros
16	Dilar dissimilis Navás, 1903	EUR	Spain	Madrid	Vaciamadrid	40.35°N	3.54°W	MNHN	Paris	Monserrat, 1988a	Revision de la obra de L. Navás, I
16	Dilar dissimilis Navás, 1903	EUR	Spain	Madrid	Vaciamadrid			MNCNM	Madrid	Monserrat, 1988a	Revision de la obra de L. Navás, I
16	Dilar dissimilis Navás, 1903	EUR	Spain	Madrid	Vaciamadrid			MNHN	Paris	Monserrat, 2014	Los diláridos de la Península Ibérica
16	Dilar dissimilis Navás, 1903	EUR	Spain	Murcia	La Perdiz, Sierra Espuña	37.87°N	1.52°W	VM	Madrid	Monserrat, 1988a	Revision de la obra de L. Navás, I
16	Dilar dissimilis Navás, 1903	EUR	Spain	Murcia	Sierra Espuña			MNCNM	Madrid	Monserrat, 1988a	Revision de la obra de L. Navás, I
16	Dilar dissimilis Navás, 1903	EUR	Spain	Valencia	Alicante, Aguas de Busot	38.63°N	0.36°W	BNHM	London	Monserrat, 1988a	Revision de la obra de L. Navás, I
16	Dilar dissimilis Navás, 1903	EUR	Spain	Valencia	Burjasot	39.51°N	0.41°W	MNCNM	Madrid	Monserrat, 1988a	Revision de la obra de L. Navás, I
16	Dilar dissimilis Navás, 1903	EUR	Spain	Valencia	Burjasot			MNHN	Paris	Monserrat, 2014	Los diláridos de la Península Ibérica
16	Dilar dissimilis Navás, 1903	EUR	Spain	Catalonia	Tarragona, Castellón, Tortosa, Carrelares	40.94°N	0.70°E	MB	Barcelona	Monserrat, 1988a	Revision de la obra de L. Navás, I
17	Dilar dochaner H. Aspöck & U. Aspöck, 1968	ASI	Afghanistan	Kabul	SO von Kabul	34.66°N	69.18°E	HUAC	Vienna	Aspöck, H. & Aspöck, U., 1968	Zwei weitere neue Spezies des Genus Dilar Rambur aus Asien
17	Dilar dochaner H. Aspöck & U. Aspöck, 1968	ASI	Afghanistan	Kabul	10 km NW von Kabul	34.58°N	69.1°E	HUAC	Vienna	Aspöck, H. & Aspöck, U., 1968	Zwei weitere neue Spezies des Genus Dilar Rambur aus Asien
17	Dilar dochaner H. Aspöck & U. Aspöck, 1968	ASI	Afghanistan	Kabul	Paghman, 30 km NW von Kabul	34.6°N	68.95°E	HUAC	Vienna	Aspöck, H. & Aspöck, U., 1968	Zwei weitere neue Spezies des Genus Dilar Rambur aus Asien
17	Dilar dochaner H. Aspöck & U. Aspöck, 1968	ASI	Afghanistan	Kabul	Paghman, 30 km NW von Kabul			HUAC	Vienna	Aspöck, H. & Aspöck, U., 1968	Zwei weitere neue Spezies des Genus Dilar Rambur aus Asien
17	Dilar dochaner H. Aspöck & U. Aspöck, 1968	ASI	Afghanistan	Kabul	Paghman, 30 km NW von Kabul			HUAC	Vienna	Aspöck, H. & Aspöck, U., 1968	Zwei weitere neue Spezies des Genus Dilar Rambur aus Asien
17	Dilar dochaner H. Aspöck & U. Aspöck, 1968	ASI	Afghanistan	Nangarhar	Safed Koh [Mountain], Südseite Kotkai	34.26°N	70.55°E	HUAC	Vienna	Li et al., 2019	Dilar from the Central Asia
18	Dilar dongchuanus Yang, 1986	ASI	China	Yunnan	Dongchuan District, Luoxuetangde [东川落雪汤德]	26.08°N	103.18°E	CAU	Beijing	Zhang et al., 2015	Dilar from Southern China
19	Dilar duelli U. Aspöck & H. Aspöck, 1995	EUR	France	Provence-Alpes-Côte-d′Azur	Var [department], Massif de l′Estérel, Col du Mistral (ONO Fréjus, ca. 30 km SW Cannes)	43.26°N	6.44°E	NHMW	Vienna	Aspöck, U. & Aspöck, H., 1995	Dilar duelli n. sp. — eine neue Spezies der Familie Dilaridae aus Europa
19	Dilar duelli U. Aspöck & H. Aspöck, 1995	EUR	Italy	Liguria		44.42°N	8.87°E			Badano, 2011	I Neurotteri (Neuropterida) della Liguria
19	Dilar duelli U. Aspöck & H. Aspöck, 1995	EUR	Italy	Piedmonte		45.07°N	7.67°E			Giacomino, 2016	Un Névroptère nouveau pour la faune de France
20	Dilar dulongjiangensis Zhang, Liu, H. Aspöck & U. Aspöck, 2015	ASI	China	Yunnan	Nujiang, Dulongjiang [怒江独龙江]	27.87°N	98.28°E	CAU	Beijing	Zhang et al., 2015	Dilar from Southern China
20	Dilar dulongjiangensis Zhang, Liu, H. Aspöck & U. Aspöck, 2015	ASI	China	Yunnan	Pianma Town, Gangfang [片马镇岗房]	26.45°N	98.77°E	CAU	Beijing
20	Dilar dulongjiangensis Zhang, Liu, H. Aspöck & U. Aspöck, 2015	ASI	China	Yunnan	Cangyuan County, Nangun National Reserve, Wengding Station [沧源县南滚河自然保护区翁丁站]	23.15°N	99.25°E	CAU	Beijing
21	Dilar forcipatus Li, H. Aspöck, U. Aspöck & Liu, 2021	ASI	Laos	Houaphanh	Ban Saleui, Phou Pan-Mt.	20.23°N	103.99°E	CHRR	Scheibbs
22	Dilar formosanus (Okamoto & Kuwayama, 1920)	ASI	China	Taiwan	Mt. Arishan [阿里山]	23.43°N	120.77°E	SEHU	Sapporo	Zhang et al., 2014c	Dilar from islands of East Asia
23	Dilar fuscus U. Aspöck, Liu & H. Aspöck, 2015	ASI	Turkey	Aydin	Str., Nazilli-Beydağ	38.01°N	28.18°E	HUAC	Vienna	Aspöck, U. et al, 2015	The Dilaridae of the Balkan Peninsula and of Anatolia
23	Dilar fuscus U. Aspöck, Liu & H. Aspöck, 2015	ASI	Turkey	Aydin	Str., Nazilli-Beydağ			CHRR	Scheibbs	Aspöck, U. et al, 2015	The Dilaridae of the Balkan Peninsula and of Anatolia
24	Dilar geometroides H. Aspöck & U. Aspöck, 1968	ASI	Nepal	Bagmati	Dolakha [District], Tampa Khosi valley	27.63°N	86.45°E	HUAC	Vienna	Aspöck, H. & Aspöck, U., 1968	Zwei weitere neue Spezies des Genus Dilar Rambur aus Asien
24	Dilar geometroides H. Aspöck & U. Aspöck, 1968	ASI	Nepal	Gandaki	[Baglung District] Modi-Khola, Pothana-Landrung, 25 km NW Pokhara (406)	28.38°N	83.96°E	CHRR	Scheibbs	Li et al., 2020	Dilar from South Asia
24	Dilar geometroides H. Aspöck & U. Aspöck, 1968	ASI	Nepal	Province No. 1	Dhankita, Arun-Valley, Chichila [Sankhuwasabha District]	27.85°N	87.07°E	CHRR	Scheibbs	Li et al., 2020	Dilar from South Asia
24	Dilar geometroides H. Aspöck & U. Aspöck, 1968	ASI	Nepal	Province No. 1	Koshi Sig.:507 / 85, Basantapur	27.1°N	87.30°E	CHRR	Scheibbs	Li et al., 2020	Dilar from South Asia
24	Dilar geometroides H. Aspöck & U. Aspöck, 1968	ASI	Nepal	Province No. 1	Prov.Nr.3 East, Sete [village]	27.58°N	86.47°E	ZSM	Munich	Aspöck, H. & Aspöck, U., 1968	Zwei weitere neue Spezies des Genus Dilar Rambur aus Asien
24	Dilar geometroides H. Aspöck & U. Aspöck, 1968	ASI	Nepal	Province No. 1	Prov.Nr.3 East, Sete [village]			HUAC	Vienna	Aspöck, H. & Aspöck, U., 1968	Zwei weitere neue Spezies des Genus Dilar Rambur aus Asien
24	Dilar geometroides H. Aspöck & U. Aspöck, 1968	ASI	Nepal	Province No. 1	Terhathum [District], Phalambung (a locality of Koshi State)	27.18°N	87.50°E	NSMT	Tokyo	Zhang et al., 2014b	Dilar from Tibet
24	Dilar geometroides H. Aspöck & U. Aspöck, 1968	ASI	India	Sikkim		27.47°N	88.47°E	BNHM	London	Li et al., 2020	Dilar from South Asia
24	Dilar geometroides H. Aspöck & U. Aspöck, 1968	ASI	China	Tibet	Linzhi City [林芝市]	29.65°N	94.35°E	CAU	Beijing	Zhang et al., 2014b	Dilar from Tibet
24	Dilar geometroides H. Aspöck & U. Aspöck, 1968	ASI	China	Tibet	Linzhi City, Milin Town, Gongbu [林芝米林镇工布]	29.21°N	94.20°E	CAU	Beijing
24	Dilar geometroides H. Aspöck & U. Aspöck, 1968	ASI	China	Tibet	Naidong County [乃东县]	29.22°N	91.75°E	CAU	Beijing	Zhang et al., 2014b	Dilar from Tibet
25	Dilar grandis (Banks, 1931)	ASI	Malaysia	Sabah	Borneo, Mt. Kinabalu, Kamborangah	5.98°N	116.24°E	BNHM	London	Zhang et al., 2016	Dilar from Southeast Asia
25	Dilar grandis (Banks, 1931)	ASI	Malaysia	Sabah	Borneo, Mt. Kinabalu, Kamborangah			BNHM	London	Zhang et al., 2016	Dilar from Southeast Asia
25	Dilar grandis (Banks, 1931)	ASI	Malaysia	Sabah	Borneo, Mt. Kinabalu, Kamborangah			MCZ	Cambridge	Zhang et al., 2016	Dilar from Southeast Asia
25	Dilar grandis (Banks, 1931)	ASI	Malaysia	Sabah	Borneo, Mt. Kinabalu, Kamborangah			BNHM	London	Zhang et al., 2016	Dilar from Southeast Asia
26	Dilar guangxiensis Zhang, Liu, H. Aspöck & U. Aspöck, 2015	ASI	China	Guangxi	Guigang City, Mt. Tianpingshan [贵港天平山]	23.13°N	109.43°E	CAU	Beijing	Zhang et al., 2015	Dilar from Southern China
26	Dilar guangxiensis Zhang, Liu, H. Aspöck & U. Aspöck, 2015	ASI	China	Guangxi	Longsheng County, Mt. Tianpingshan [龙胜天平山]			IZCAS	Beijing	Zhang et al., 2015	Dilar from Southern China
26	Dilar guangxiensis Zhang, Liu, H. Aspöck & U. Aspöck, 2015	ASI	China	Guangxi	Huaping Village, Dayan [花坪村大岩]	25.63°N	109.91°E	CAU	Beijing
26	Dilar guangxiensis Zhang, Liu, H. Aspöck & U. Aspöck, 2015	ASI	China	Guangxi	Huaping Natural Reserve, Cujiang station [花坪保护区粗江保护站]			CAU	Beijing
26	Dilar guangxiensis Zhang, Liu, H. Aspöck & U. Aspöck, 2015	ASI	China	Guangxi	Huaping [Natural Reserve], Hongtan [花坪自然保护区红滩保护站]	25.25°N	110.18°E	CAU	Beijing	Zhang et al., 2015	Dilar from Southern China
26	Dilar guangxiensis Zhang, Liu, H. Aspöck & U. Aspöck, 2015	ASI	China	Guizhou	Jiangkou County, guanhe Township, Jiangxitun Village [江口县官和乡江溪屯村]	27.51°N	108.58°E	CAU	Beijing
26	Dilar guangxiensis Zhang, Liu, H. Aspöck & U. Aspöck, 2015	ASI	China	Guizhou	Leishan County, Mt. Leigongshan [雷山县雷公山芳祥]	26.73°N	108.45°E	CAU	Beijing	Zhang et al., 2015	Dilar from Southern China
27	Dilar harmandi (Navás, 1909)	ASI	Bhutan	Paro	Chiley-La	27.56°N	89.43°E	CHRR	Scheibbs	Li et al., 2020	Dilar from South Asia
27	Dilar harmandi (Navás, 1909)	ASI	Bhutan	Paro	Chiley-La			CHRR	Scheibbs	Li et al., 2020	Dilar from South Asia
27	Dilar harmandi (Navás, 1909)	ASI	Bhutan	Thimphu	Thimphu Distr[ict], Taba	27.5°N	89.63°E	CHRR	Scheibbs	Li et al., 2020	Dilar from South Asia
27	Dilar harmandi (Navás, 1909)	ASI	Bhutan	Thimphu	Thimphu Distr[ict], Taba			CHRR	Scheibbs	Li et al., 2020	Dilar from South Asia
27	Dilar harmandi (Navás, 1909)	ASI	India	West Bengal	Darjeeling	27.03°N	88.33°E	MNHN	Paris	Zhang et al., 2014b	Dilar from Tibet
27	Dilar harmandi (Navás, 1909)	ASI	Nepal	Bagmati	Prov. Nr.1 East Phulchauki	27.59°N	85.44°E	HUAC	Vienna	Zhang et al., 2014b	Dilar from Tibet
27	Dilar harmandi (Navás, 1909)	ASI	Nepal	Bagmati	Prov. Nr.1 East Phulchauki			ZSM	Munich	Zhang et al., 2014b	Dilar from Tibet
27	Dilar harmandi (Navás, 1909)	ASI	Nepal	Bagmati	Sindhupalchok Sarmatang	27.57°N	85.35°E	CHRR	Scheibbs	Li et al., 2020	Dilar from South Asia
27	Dilar harmandi (Navás, 1909)	ASI	Nepal	Gandaki	Myagdi Distr[ict], Ghorepani	28.24°N	83.42°E	CHRR	Scheibbs	Li et al., 2020	Dilar from South Asia
27	Dilar harmandi (Navás, 1909)	ASI	Nepal	Gandaki	Myagdi Distr[ict], Hille-Ghorepani			CHRR	Scheibbs	Li et al., 2020	Dilar from South Asia
27	Dilar harmandi (Navás, 1909)	ASI	Nepal	Gandaki	am Fluβ, Kalu Gandaki Khola, Kalopani-Kopehepani	28.73°N	83.61°E	CHRR	Scheibbs	Li et al., 2020	Dilar from South Asia
27	Dilar harmandi (Navás, 1909)	ASI	Nepal	Gandaki	am Fluβ, Kalu Gandaki Khola, Kalopani	29.73°N	84.61°E	CHRR	Scheibbs	Li et al., 2020	Dilar from South Asia
27	Dilar harmandi (Navás, 1909)	ASI	Nepal	Gandaki	Ghar-Kola, Chitre, 35 km NW, Pokhara	28.3°N	83.4°E	CHRR	Scheibbs	Li et al., 2020	Dilar from South Asia
27	Dilar harmandi (Navás, 1909)	ASI	Nepal	Gandaki	Modi-Khola, Landrung, 25 km NW Pokhara	28.13°N	83.57°E	CHRR	Scheibbs	Li et al., 2020	Dilar from South Asia
27	Dilar harmandi (Navás, 1909)	ASI	Nepal	Gandaki	Modi-Khola, Banthanti-Landrung, 25 km NW Pokhara			CHRR	Scheibbs	Li et al., 2020	Dilar from South Asia
27	Dilar harmandi (Navás, 1909)	ASI	Nepal	Gandaki	W Mardi Himal near Deurali (female, treat as D. harmandi)	28.3°N	83.82°E	NMNH	Washington	Martins et al., 2018	Notes on pleasing lacewing genus Dilar Rambur
27	Dilar harmandi (Navás, 1909)	ASI	Nepal	Province No. 1	Khumbu, Khumdzung (Sagarmāthā zone)	28.25°N	86.82°E	ZSM	Munich	Zhang et al., 2014b	Dilar from Tibet
27	Dilar harmandi (Navás, 1909)	ASI	Nepal	Province No. 1	Koshi Sig.:507 / 85, Basantapur	27.1°N	87.3°E	CHRR	Scheibbs	Li et al., 2020	Dilar from South Asia
27	Dilar harmandi (Navás, 1909)	ASI	Nepal	Province No. 1	Prov. Nr.3 East Bujan, Dudh Kosi Tal (=Solukhumbu, Dudhkoshi)	27.24°N	86.59°E	ZSM	Munich	Zhang et al., 2014b	Dilar from Tibet
27	Dilar harmandi (Navás, 1909)	ASI	Nepal	Province No. 1	Prov. Nr.3 East Bujan, Sete	27.58°N	86.47°E	ZSM	Munich	Zhang et al., 2014b	Dilar from Tibet
27	Dilar harmandi (Navás, 1909)	ASI	Nepal	Province No. 1	Prov. Nr.3 East Lamjura Pass			ZSM	Munich	Zhang et al., 2014b	Dilar from Tibet
27	Dilar harmandi (Navás, 1909)	ASI	Nepal	Province No. 1	Prov. Nr.3 East Bujan, Tal unter Thangpoche (=Khumbu, Tengboche)	27.84°N	86.76°E	ZSM	Munich	Zhang et al., 2014b	Dilar from Tibet
27	Dilar harmandi (Navás, 1909)	ASI	Nepal	Province No. 1	Taplejung, Walungchung Gola [a locality of Mechi State]	27.62°N	87.77°E	NSMT	Tokyo	Zhang et al., 2014b	Dilar from Tibet
27	Dilar harmandi (Navás, 1909)	ASI	Nepal	Province No. 1	Taplejung, Walungchung Gola [a locality of Mechi State]			NSMT	Tokyo	Zhang et al., 2014b	Dilar from Tibet
27	Dilar harmandi (Navás, 1909)	ASI	China	Tibet	Linzhi City, Nanyigou [林芝南伊沟]	29.64°N	91.17°E	CAU	Beijing
27	Dilar harmandi (Navás, 1909)	ASI	China	Tibet	Yadong County, Mt. Naituilashan [亚东县乃推拉山]	27.4°N	88.85°E	CAU	Beijing	Zhang et al., 2014b	Dilar from Tibet
27	Dilar harmandi (Navás, 1909)	ASI	China	Tibet	Yadong County, Renqinggang [亚东县仁青岗]	29.11°N	90.13°E	CAU	Beijing
27	Dilar harmandi (Navás, 1909)	ASI	China	Tibet	Zhangmu, Lixin [樟木立新]	27.98°N	85.97°E	CAU	Beijing	Zhang et al., 2014b	Dilar from Tibet
27	Dilar harmandi (Navás, 1909)	ASI	China	Tibet	Zhangmu, Xuebugang [樟木雪布岗]	27.95°N	85.98°E	CAU	Beijing
28	Dilar hastatus Zhang, Liu, H. Aspöck & U. Aspöck, 2014	ASI	China	Hebei	Huailai [怀来]	40.4°N	115.5°E	CAU	Beijing	Zhang et al., 2014a	Dilar from northern China
28	Dilar hastatus Zhang, Liu, H. Aspöck & U. Aspöck, 2014	ASI	China	Hebei	Zhuolu County, Yangjiaping [涿鹿杨家坪]	39.97°N	115.38°E	CAU	Beijing	Zhang et al., 2014a	Dilar from northern China
28	Dilar hastatus Zhang, Liu, H. Aspöck & U. Aspöck, 2014	ASI	China	Beijing	Mentougou, Xiaolongmen [门头沟小龙门]	35.1°N	115.15°E	CAU	Beijing	Zhang et al., 2014a	Dilar from northern China
28	Dilar hastatus Zhang, Liu, H. Aspöck & U. Aspöck, 2014	ASI	China	Beijing	Mentougou, Xiaolongmen [门头沟小龙门]			CAU	Beijing	Zhang et al., 2014a	Dilar from northern China
28	Dilar hastatus Zhang, Liu, H. Aspöck & U. Aspöck, 2014	ASI	China	Beijing	Mentougou, Xiaolongmen [门头沟小龙门]			CAU	Beijing	Zhang et al., 2014a	Dilar from northern China
28	Dilar hastatus Zhang, Liu, H. Aspöck & U. Aspöck, 2014	ASI	China	Beijing	Mentougou, Xiaolongmen [门头沟小龙门]			CAU	Beijing	Zhang et al., 2014a	Dilar from northern China
28	Dilar hastatus Zhang, Liu, H. Aspöck & U. Aspöck, 2014	ASI	China	Beijing	Mentougou, Xiaolongmen [门头沟小龙门]			HUAC	Vienna	Zhang et al., 2014a	Dilar from northern China
28	Dilar hastatus Zhang, Liu, H. Aspöck & U. Aspöck, 2014	ASI	China	Beijing	Seshufen [色树坟]	39.97°N	116°E	CAU	Beijing
29	Dilar hikosanus Nakahara, 1955	ASI	Japan	Fukuoka	Hikosan	33.02°N	131.02°E	NSMT	Tokyo	Zhang et al., 2014c	Dilar from islands of East Asia
29	Dilar hikosanus Nakahara, 1955	ASI	Japan	Fukuoka	Hikosan, Buzen	33.55°N	131.03°E	NIAES	Tsukuba	Zhang et al., 2014c	Dilar from islands of East Asia
30	Dilar hornei McLachlan, 1869	ASI	India	West Bengal	West Bengal, Darjeeling, Kurseong, E. Himalayas [dubious locality]	27.15°N	88.27°E			Ghosh, 2000	Records of the zoological survey of India
31	Dilar insularis Zhang, Liu, U. Aspöck in Zhang et al., 2014	ASI	China	Hainan	Baisha County, Bawangling, dongerlinchang [白沙县霸王岭东二林场]	19.13°N	109.25°E	CAU	Beijing	Zhang et al., 2014c	Dilar from islands of East Asia
31	Dilar insularis Zhang, Liu, U. Aspöck in Zhang et al., 2014	ASI	China	Hainan	Lingshui County, Mt. Diaoluoshan [陵水吊罗山]	18.65°N	109.9°E	CAU	Beijing	Zhang et al., 2014c	Dilar from islands of East Asia
31	Dilar insularis Zhang, Liu, U. Aspöck in Zhang et al., 2014	ASI	China	Hainan	Mt. Wuzhishan [五指山顶]	18.77°N	109.5°E	CAU	Beijing	Zhang et al., 2014c	Dilar from islands of East Asia
31	Dilar insularis Zhang, Liu, U. Aspöck in Zhang et al., 2014	ASI	China	Taiwan	Nantou	23.92°N	120.67°E	NSMT	Tokyo	Zhang et al., 2014c	Dilar from islands of East Asia
32	Dilar japonicus McLachlan, 1883	ASI	Japan	Aomori	Aomori, Tsuta-onsen	40.22°N	140.5°E	NIAES	Tsukuba	Zhang et al., 2014c	Dilar from islands of East Asia
32	Dilar japonicus McLachlan, 1883	ASI	Japan	Aomori	Atakatva and Tsuta-spa [Tsuta-onsen?]					Nakahara, 1955b	Dilaridae of Japan and Formosa (Neuroptera)
32	Dilar japonicus McLachlan, 1883	ASI	Japan	Ehime	Mt. Ishizuchi, Shikoku	33.77°N	133.12°E			Nakahara, 1955b	Dilaridae of Japan and Formosa (Neuroptera)
32	Dilar japonicus McLachlan, 1883	ASI	Japan	Fukuoka	[Mt.] Inugatake [Toriihata, Buzen-shi]	33.55°N	131.03°E			Nakahara, 1955b	Dilaridae of Japan and Formosa (Neuroptera)
32	Dilar japonicus McLachlan, 1883	ASI	Japan	Fukuoka	Hikosan	33.48°N	130.93°E			Nakahara, 1955b	Dilaridae of Japan and Formosa (Neuroptera)
32	Dilar japonicus McLachlan, 1883	ASI	Japan	Fukushima		37.73°N	140.47°E	BNHM	London	Zhang et al., 2014c	Dilar from islands of East Asia
32	Dilar japonicus McLachlan, 1883	ASI	Japan	Fukushima	Yokomuki Onsen	37.88°N	140.55°E	NIAES	Tsukuba	Zhang et al., 2014c	Dilar from islands of East Asia
32	Dilar japonicus McLachlan, 1883	ASI	Japan	Gunma	Kuni-mura	36.63°N	138.63°E	NIAES	Tsukuba	Zhang et al., 2014c	Dilar from islands of East Asia
32	Dilar japonicus McLachlan, 1883	ASI	Japan	Gunma		36.38°N	139.05°E	NIAES	Tsukuba	Zhang et al., 2014c	Dilar from islands of East Asia
32	Dilar japonicus McLachlan, 1883	ASI	Japan	Kōchi	Mt. Sara	33.75°N	133.5°E	NIAES	Tsukuba	Zhang et al., 2014c	Dilar from islands of East Asia
32	Dilar japonicus McLachlan, 1883	ASI	Japan	Kyoto	鞍马山 [Mt. Kurama]	35.12°N	135.77°E			Kuwayama, 1921	Studies on the Dilaridae of Japan
32	Dilar japonicus McLachlan, 1883	ASI	Japan	Miyazaki	[Mt.] Sobosan	32.82°N	131.35°E			Nakahara, 1955b	Dilaridae of Japan and Formosa (Neuroptera)
32	Dilar japonicus McLachlan, 1883	ASI	Japan	Nagano	Usui-Toge [Usui Pass]	36.34°N	138.65°E			Nakahara, 1955b	Dilaridae of Japan and Formosa (Neuroptera)
32	Dilar japonicus McLachlan, 1883	ASI	Japan	Mie / Nara	大台ヶ原山 [Mt. Ōdaigahara]	34.18°N	136.10°E			Kuwayama, 1921	Studies on the Dilaridae of Japan
32	Dilar japonicus McLachlan, 1883	ASI	Japan	Nara	山上[ヶ]岳 [Mt. Ōmine]	34.25°N	135.93°E			Kuwayama, 1921	Studies on the Dilaridae of Japan
32	Dilar japonicus McLachlan, 1883	ASI	Japan	Nara	吉野山 [Mt. Yoshino]	34.35°N	135.87°E			Kuwayama, 1921	Studies on the Dilaridae of Japan
32	Dilar japonicus McLachlan, 1883	ASI	Japan	Nara	[Holotype of Dilar nohirae] Yoshino, Yamato Province					Nakahara, 1914	A new Dilar species from Japan
32	Dilar japonicus McLachlan, 1883	ASI	Japan	Yamanashi	Yamanashi, Shojiko	35.48°N	138.6°E	NIAES	Tsukuba	Zhang et al., 2014c	Dilar from islands of East Asia
33	Dilar juniperi Monserrat, 1988	EUR	Spain	Andalucía	Jaén, Aldeaquemada	38.40°N	3.42°W	VM	Madrid	Monserrat, 2014	Los diláridos de la Península Ibérica
33	Dilar juniperi Monserrat, 1988	EUR	Spain	Andalucía	Jaén, Collado de los Jardines	38.33°N	3.5°W	VM	Madrid	Monserrat, 1988b	Revisión de los dildridos ibéricos
33	Dilar juniperi Monserrat, 1988	EUR	Spain	Andalucía	Jaén, Sierra de Córdoba, Los Villares-Asuan	37.71°N	3.83°W	VM	Madrid	Monserrat, 2005	Nuevos datos sobre algunas pequeñas familias de neurópteros
33	Dilar juniperi Monserrat, 1988	EUR	Spain	Andalucía	Jaén, Sierra de la Pandera, Valdepeñas de Jaén			VM	Madrid	Monserrat, 2014	Los diláridos de la Península Ibérica
34	Dilar kirgisus H. Aspöck & U. Aspöck, 1967	ASI	Iran	Alborz	Elburz-Gebirge 14 km nördl. Keredj [Alborz Province, Karaj County, Elburz Mountain], [=Alborz Province, Karaj County, Elburz Mountain]	36.16°N	51°E	HUAC	Vienna	Li et al., 2019	Dilar from the Central Asia
34	Dilar kirgisus H. Aspöck & U. Aspöck, 1967	ASI	Iran	Markazi	Markazi Tafresh 10 km SSE (Pass) [Markazi Province, Tafresh county]	34.74°N	50.01°E	HUAC	Vienna	Li et al., 2019	Dilar from the Central Asia
34	Dilar kirgisus H. Aspöck & U. Aspöck, 1967	ASI	Iran	Golestan	Khorosan, NP Golestan-Almeh [Golestan Province, Gorgan City, Golestan National Park, Sulgerd area]	37.35°N	56.12°E	CHRR	Scheibbs	Li et al., 2019	Dilar from the Central Asia
34	Dilar kirgisus H. Aspöck & U. Aspöck, 1967	ASI	Iran	Golestan	Prov. KHORASAN, ELBURS-MTS., SULGERD, LUX [Golestan Province, Gorgan City, Golestan National Park, Sulgerd area]	37.44°N	56.15°E	CHRR	Scheibbs	Li et al., 2019	Dilar from the Central Asia
34	Dilar kirgisus H. Aspöck & U. Aspöck, 1967	ASI	Iran	Golestan	[Holotype of Dilar golestani] Golestan Forest	36.68°N	48.42°E	FARU	Kermanshah	Monserrat, 2005	Nuevos datos sobre algunas pequeñas familias de neurópteros
34	Dilar kirgisus H. Aspöck & U. Aspöck, 1967	ASI	Iran	Golestan	[Paratypes of Dilar golestani] Golestan Forest, Golzar camping site			FARU	Kermanshah	Mirmoayedi & Yassayie, 1999	Dilar golestani sp. n. (Neuroptera: Dilaridae) from Iran
34	Dilar kirgisus H. Aspöck & U. Aspöck, 1967	ASI	Iran	Golestan	[Paratypes of Dilar golestani] Sharlegh			FARU	Kermanshah	Mirmoayedi & Yassayie, 1999	Dilar golestani sp. n. (Neuroptera: Dilaridae) from Iran
34	Dilar kirgisus H. Aspöck & U. Aspöck, 1967	ASI	Iran	North Khorasan	[Paratypes of Dilar golestani] Dasht	37.30°N	56.00°E	FARU	Kermanshah	Mirmoayedi & Yassayie, 1999	Dilar golestani sp. n. (Neuroptera: Dilaridae) from Iran
34	Dilar kirgisus H. Aspöck & U. Aspöck, 1967	ASI	Kyrgyzstan	Chuy	Prov. Tschuy, Distr. Kemin, Tal des Tschon-Kemin [Chuy Region, Kemin District, Tschon-kemin Valley]	42.68°N	75.95°E	CHRR	Scheibbs	Li et al., 2019	Dilar from the Central Asia
34	Dilar kirgisus H. Aspöck & U. Aspöck, 1967	ASI	Kyrgyzstan	Chuy	Suusamyr Plateau, nahe Tju-Zaschy-Paβ [Suusamyr Valley]	42.33°N	73.83°E	CHRR	Scheibbs	Li et al., 2019	Dilar from the Central Asia
34	Dilar kirgisus H. Aspöck & U. Aspöck, 1967	ASI	Kyrgyzstan	Issyk-Kul		43.14°N	77.44°E	HUAC	Vienna	Aspöck, H. & Aspöck, U., 1967	Neue Dilariden aus Asien (Neuroptera, Planipennia)
34	Dilar kirgisus H. Aspöck & U. Aspöck, 1967	ASI	Kyrgyzstan	Jalal-Abad	Distrikt Chatkal, Chatkal′sky Khrebet, NW des Passes Chap-Chyma	41.55°N	70.77°E	HUAC	Vienna	Li et al., 2019	Dilar from the Central Asia
34	Dilar kirgisus H. Aspöck & U. Aspöck, 1967	ASI	Kyrgyzstan	Jalal-Abad	Fergana-Gebirge[Fergana Valley], Urumbasch-Fluβ nahe Bergut- Paβ [Urumbasch River, Bergut Mountain]	40.87°N	73.13°E	CHRR	Scheibbs	Li et al., 2019	Dilar from the Central Asia
34	Dilar kirgisus H. Aspöck & U. Aspöck, 1967	ASI	Kyrgyzstan	Jalal-Abad	Distr. Toktogul, S Toktogul-Stausee, Baiysch-Bulak [Jalal-Abad Region, Toktogul District]	41.78°N	72.99°E	CHRR	Scheibbs	Li et al., 2019	Dilar from the Central Asia
34	Dilar kirgisus H. Aspöck & U. Aspöck, 1967	ASI	Kyrgyzstan	Jalal-Abad	Toktogul District [Jalal-Abad Region, Toktogul District]			CHRR	Scheibbs	Li et al., 2019	Dilar from the Central Asia
34	Dilar kirgisus H. Aspöck & U. Aspöck, 1967	ASI	Kyrgyzstan	Jalal-Abad	Tschatkal Mts, Kassansay river valley near, Ala Buka [Jalal-Abad Region, Ala Buka District, Ala Buka Village]	41.38°N	71.35°E	HUAC	Vienna	Li et al., 2019	Dilar from the Central Asia
34	Dilar kirgisus H. Aspöck & U. Aspöck, 1967	ASI	Kyrgyzstan	Osh	Distr., Dchon-Alajsky, Alai-Geb., am Ok-Suu [Chong-Alay District, Alai Mountain]	39.74°N	72.01°E	CHRR	Scheibbs	Li et al., 2019	Dilar from the Central Asia
34	Dilar kirgisus H. Aspöck & U. Aspöck, 1967	ASI	Turkmenistan	Mary	Балхыэский заповецник [Badhyz State Nature Reserve]	35.87°N	61.67°E			Zakharenko, 1988	Neuroptera of the fauna of the USSR. II. Fam. Dilaridae, Berothidae and Sisyridae
34	Dilar kirgisus H. Aspöck & U. Aspöck, 1967	ASI	Tajikistan	Gorno-Badakhshan Province	Памир, Xopor [Mts. Pamir]	39.27°N	71.99°E			Zakharenko, 1988	Neuroptera of the fauna of the USSR. II. Fam. Dilaridae, Berothidae and Sisyridae
34	Dilar kirgisus H. Aspöck & U. Aspöck, 1967	ASI	Tajikistan	Gorno-Badakhshan Province	Памир, Xopor [Mts. Pamir]					Zakharenko, 1988	Neuroptera of the fauna of the USSR. II. Fam. Dilaridae, Berothidae and Sisyridae
34	Dilar kirgisus H. Aspöck & U. Aspöck, 1967	ASI	Tajikistan	Gorno-Badakhshan Province	Памир, Xopor [Mts. Pamir]					Zakharenko, 1988	Neuroptera of the fauna of the USSR. II. Fam. Dilaridae, Berothidae and Sisyridae
34	Dilar kirgisus H. Aspöck & U. Aspöck, 1967	ASI	Tajikistan	Districts under Central Government Jurisdiction	заповедник, Рамит [Ramit State Nature Reserve]	38.86°N	69.32°E			Zakharenko, 1988	Neuroptera of the fauna of the USSR. II. Fam. Dilaridae, Berothidae and Sisyridae
34	Dilar kirgisus H. Aspöck & U. Aspöck, 1967	ASI	Tajikistan	Districts under Central Government Jurisdiction	заповедник, Рамит [Ramit State Nature Reserve]					Zakharenko, 1988	Neuroptera of the fauna of the USSR. II. Fam. Dilaridae, Berothidae and Sisyridae
34	Dilar kirgisus H. Aspöck & U. Aspöck, 1967	ASI	China	Xinjiang	Gongliu County, Kuerdening Natural Reserve [巩留县库尔德宁自然保护区]	43.22°N	82.84°E	CAU	Beijing
35	Dilar laoticus Li, H. Aspöck, U. Aspöck & Liu, 2021	ASI	Laos	Houaphanh	Phou Pan (M[oun]t[ain]), Ban Saleui (Ort)	20.23°N	103.99°E	CHRR	Scheibbs
35	Dilar laoticus Li, H. Aspöck, U. Aspöck & Liu, 2021	ASI	Laos	Houaphanh	Phou Pan (M[oun]t[ain]), Ban Saleui (Ort)			NHMW	Vienna
36	Dilar lii Zhang, Liu, H. Aspöck & U. Aspöck, 2015	ASI	China	Guangxi	Laibin City, [Jinxiu County,] Mt. Dayaoshan [来宾金秀县大瑶山]	24.03°N	110.32°E	CAU	Beijing	Zhang et al., 2015	Dilar from Southern China
37	Dilar lijiangensis Zhang, Liu, H. Aspöck & U. Aspöck, 2015	ASI	China	Yunnan	Lijiang [丽江]	26.87°N	100.22°E	MFN	Berlin	Zhang et al., 2015	Dilar from Southern China
37	Dilar lijiangensis Zhang, Liu, H. Aspöck & U. Aspöck, 2015	ASI	China	Yunnan	Lijiang, Gaoshan Botanical Garden [丽江高山植物园]	27°N	100.18°E	IZCAS	Beijing	Zhang et al., 2015	Dilar from Southern China
37	Dilar lijiangensis Zhang, Liu, H. Aspöck & U. Aspöck, 2015	ASI	China	Yunnan	Lijiang, Gaoshan Botanical Garden [丽江高山植物园]			IZCAS	Beijing	Zhang et al., 2015	Dilar from Southern China
37	Dilar lijiangensis Zhang, Liu, H. Aspöck & U. Aspöck, 2015	ASI	China	Yunnan	Lijiang [City], Mt. Yulongshan, Baishui [丽江玉龙山白水]	26.85°N	100.27°E	HUAC	Vienna
38	Dilar lineatus Zhang, Liu & Winterton in Zhang et al., 2016	ASI	Vietnam	Thua Thien Hue	Bach Ma National Park	16.19°N	107.85°E	CAU	Beijing	Zhang et al., 2016	Dilar from Southeast Asia
38	Dilar lineatus Zhang, Liu & Winterton in Zhang et al., 2016	ASI	Vietnam	Thua Thien Hue	Bach Ma National Park			CAU	Beijing	Zhang et al., 2016	Dilar from Southeast Asia
39	Dilar loeinensis Zhang, Liu & Winterton in Zhang et al., 2016	ASI	Thailand	Loei	Phu Kradueng NP, Forest protection unit Loei. 5 (Phakbung)	16.83°N	101.68°E	CSCA	Sacramento	Zhang et al., 2016	Dilar from Southeast Asia
39	Dilar loeinensis Zhang, Liu & Winterton in Zhang et al., 2016	ASI	Thailand	Loei	Phu Ruea NP Pha Lon Noi	17.52°N	101.34°E	CAU	Beijing
40	Dilar longidens Zhang, Liu, H. Aspöck & U. Aspöck, 2015	ASI	China	Guangxi	Guilin, Huaping Natural Reserve, Cujiang [桂林花坪保护区粗江]	25.25°N	110.18°E	CAU	Beijing	Zhang et al., 2015	Dilar from Southern China
40	Dilar longidens Zhang, Liu, H. Aspöck & U. Aspöck, 2015	ASI	China	Guangxi	Guilin, Huaping Natural Reserve, Hongtan [桂林花坪保护区红滩]			CAU	Beijing	Zhang et al., 2015	Dilar from Southern China
40	Dilar longidens Zhang, Liu, H. Aspöck & U. Aspöck, 2015	ASI	China	Guangxi	Guilin, Longsheng County, Cujiang [桂林龙胜县粗江]			CAU	Beijing	Zhang et al., 2015	Dilar from Southern China
40	Dilar longidens Zhang, Liu, H. Aspöck & U. Aspöck, 2015	ASI	China	Guizhou	Zunyi City, Suiyang County, jianba Town, Jinba Vallage [遵义绥阳县枧坝镇井坝村]	28.12°N	107°E	CAU	Beijing
41	Dilar macleodi Oswald & Schiff, 2001	ASI	Malaysia	Sarawak	Borneo, Gunung [= Mt.] Buda, ca. 64 km S Limbang	4.22°N	114.93°E	TAMUIC	Texas	Oswald & Schiff, 2001	A new species of the genus Dilar
41	Dilar macleodi Oswald & Schiff, 2001	ASI	Malaysia	Sarawak	Borneo, Gunung [= Mt.] Buda, ca. 64 km S Limbang			UCD	California	Oswald & Schiff, 2001	A new species of the genus Dilar
41	Dilar macleodi Oswald & Schiff, 2001	ASI	Malaysia	Sarawak	Borneo, Gunung [= Mt.] Buda, ca. 64 km S Limbang			BNHM	London	Oswald & Schiff, 2001	A new species of the genus Dilar
41	Dilar macleodi Oswald & Schiff, 2001	ASI	Malaysia	Sarawak	Borneo, Gunung [= Mt.] Buda, ca. 64 km S Limbang			NMNH	Washington	Oswald & Schiff, 2001	A new species of the genus Dilar
41	Dilar macleodi Oswald & Schiff, 2001	ASI	Malaysia	Sarawak	Borneo, Gunung [= Mt.] Buda, ca. 64 km S Limbang					Oswald & Schiff, 2001	A new species of the genus Dilar
41	Dilar macleodi Oswald & Schiff, 2001	ASI	Malaysia	Sarawak	Borneo, Gunung [= Mt.] Buda, ca. 64 km S Limbang			FSCA	Florida	Oswald & Schiff, 2001	A new species of the genus Dilar
41	Dilar macleodi Oswald & Schiff, 2001	ASI	Malaysia	Sarawak	Borneo, Gunung [= Mt.] Buda, ca. 64 km S Limbang			CASC	San Francisco	Oswald & Schiff, 2001	A new species of the genus Dilar
41	Dilar macleodi Oswald & Schiff, 2001	ASI	Malaysia	Sarawak	Borneo, Gunung [= Mt.] Buda, ca. 64 km S Limbang			NHMW	Vienna	Zhang et al., 2016	Dilar from Southeast Asia
42	Dilar maculosus Zhang, Liu, H. Aspöck & U. Aspöck, 2015	ASI	China	Yunnan	Baoshan City, Nankang Village [保山市赧亢村]	24.82°N	98.77°E	CAU	Beijing	Zhang et al., 2015	Dilar from Southern China
42	Dilar maculosus Zhang, Liu, H. Aspöck & U. Aspöck, 2015	ASI	China	Yunnan	Yingjiang County, Longchuan County, Yunchuan Temple [盈江陇川云川寺]	24.05°N	97.69°E	CAU	Beijing
42	Dilar maculosus Zhang, Liu, H. Aspöck & U. Aspöck, 2015	ASI	China	Yunnan	Yingjiang County, Sudian Township [盈江县苏典乡]	25.1°N	97.94°E	CAU	Beijing
42	Dilar maculosus Zhang, Liu, H. Aspöck & U. Aspöck, 2015	ASI	China	Yunnan	Baoshan City, Nankang Village, Gaoligong Natural Park [保山赧亢村高黎贡自然公园]	24.84°N	98.8°E	CAU	Beijing
42	Dilar maculosus Zhang, Liu, H. Aspöck & U. Aspöck, 2015	ASI	China	Yunnan	Baoshan City, Baihualing Village, Guxing [保山百花岭村古星寨]	25.07°N	98.48°E	CAU	Beijing
42	Dilar maculosus Zhang, Liu, H. Aspöck & U. Aspöck, 2015	ASI	China	Yunnan	Longling County, Longjiang Township, Xiaoheishan Forest Reserve, Guchengshan	24.83°N	98.76°E	CASC	San Francisco
42	Dilar maculosus Zhang, Liu, H. Aspöck & U. Aspöck, 2015	ASI	China	Yunnan	Longyang County, Mangkuan Township, Baihualing Village, Zaotang He	25.31°N	98.79°E	CASC	San Francisco
43	Dilar malickyi Li, H. Aspöck, U. Aspöck & Liu, 2021	ASI	Thailand	Mae Hong Son	[Pang Mapha District] Tham Than Lod N[atinal]P[ark]	14.45°N	99.2°E	CHRR	Scheibbs
44	Dilar maoershanensis Zhang, Liu, H. Aspöck & U. Aspöck, 2015	ASI	China	Guangxi	Guilin, Mt. Maoershan, Antangping [桂林猫儿山]	25.88°N	110.48°E	CAU	Beijing	Zhang et al., 2015	Dilar from Southern China
45	Dilar marmoratus (Banks, 1931)	ASI	Thailand	Mae Hong Son	Tham Than La [Lod Natinal Park]	14.46°N	99.2°E	HUAC	Vienna
45	Dilar marmoratus (Banks, 1931)	ASI	Thailand	Nakhon Si Thammarat	Peninsular Siam, Nakon Sri Tamarat, Khao Luang	8.52°N	99.78°E	MCZ	Cambridge	Zhang et al., 2016	Dilar from Southeast Asia
46	Dilar megalopterus Yang, 1986	ASI	China	Yunnan	Dongchuan District, Shaziba [东川沙子坝]	26.2°N	103.02°E	CAU	Beijing	Zhang et al., 2015	Dilar from Southern China
47	Dilar meridionalis Hagen, 1866	EUR	Andorra	La Massana	Masana [Massana]	42.58°N	1.48°E	MNHN	Paris	Monserrat, 1988b	Revisión de los dildridos ibéricos
47	Dilar meridionalis Hagen, 1866	EUR	Andorra	La Massana	Masana [Massana]			MB	Barcelona	Monserrat, 2014	Los diláridos de la Península Ibérica
47	Dilar meridionalis Hagen, 1866	EUR	Andorra	La Massana	cumbre de Arinsal, pic San Fonts			MB	Barcelona	Monserrat, 2014	Los diláridos de la Península Ibérica
47	Dilar meridionalis Hagen, 1866	EUR	Andorra	La Massana	cumbre de Arinsal, pic San Fonts			MB	Barcelona	Monserrat, 2014	Los diláridos de la Península Ibérica
47	Dilar meridionalis Hagen, 1866	EUR	France	Occitanie	Pyrénées-Orientales, 'Vallée de Nohèdes' [Nohèdes (town) = ca. 11 km W of Prades]	42.63°N	2.42°W			Oswald, 1998	Catalogue of the Dilaridae
47	Dilar meridionalis Hagen, 1866	EUR	Portugal	Bragança	França, Ria Sabor	41.81°N	6.76°W	VM	Madrid	Monserrat, 2005	Nuevos datos sobre algunas pequeñas familias de neurópteros
47	Dilar meridionalis Hagen, 1866	EUR	Portugal	Porto	[between Distr. Vila Real and Distr. Porto] Amarante, Serra do Marao, Torno, Ribeiro do Ramalhoso	41.28°N	7.92°W	VM	Madrid	Monserrat, 2005	Nuevos datos sobre algunas pequeñas familias de neurópteros
47	Dilar meridionalis Hagen, 1866	EUR	Portugal	Porto	Douro Litoral, Vila do Conde, Rio Ave	41.37°N	8.68°W	VM	Madrid	Monserrat, 2005	Nuevos datos sobre algunas pequeñas familias de neurópteros
47	Dilar meridionalis Hagen, 1866	EUR	Spain	Andalucía	Granada, Sierra Nevada (mountains) near Granada	37.06°N	3.30°W			Oswald, 1998	Catalogue of the Dilaridae
47	Dilar meridionalis Hagen, 1866	EUR	Spain	Andalucía	Jaén, Aldeaquemada	38.40°N	3.42°W	VM	Madrid	Monserrat, 2014	Los diláridos de la Península Ibérica
47	Dilar meridionalis Hagen, 1866	EUR	Spain	Andalucía	[Jaén] Arroyo de la Fuensanta	37.62°N	3.96°W	VM	Madrid	Monserrat, 1988b	Revisión de los dildridos ibéricos
47	Dilar meridionalis Hagen, 1866	EUR	Spain	Andalucía	Jaén, [Arroyo de] Roblehondo	37.94°N	2.90°W	VM	Madrid	Monserrat, 2005	Nuevos datos sobre algunas pequeñas familias de neurópteros
47	Dilar meridionalis Hagen, 1866	EUR	Spain	Andalucía	Jaén, Camino [de Montero], [La] Agracea	38.21°N	2.70°W	VM	Madrid	Monserrat, 2005	Nuevos datos sobre algunas pequeñas familias de neurópteros
47	Dilar meridionalis Hagen, 1866	EUR	Spain	Andalucía	Jaén, Cazorla, Hoyos de Muñoz	37.92°N	3.00°W	VM	Madrid	Monserrat, 2005	Nuevos datos sobre algunas pequeñas familias de neurópteros
47	Dilar meridionalis Hagen, 1866	EUR	Spain	Andalucía	Jaén, Cazorla, Hoyos de Muñoz			VM	Madrid	Monserrat, 2005	Nuevos datos sobre algunas pequeñas familias de neurópteros
47	Dilar meridionalis Hagen, 1866	EUR	Spain	Andalucía	Jaén, Embalse de la Bolera	37.78°N	2.90°W	UAH	Madrid	Díaz-Aranda & Monserrat, 1988a	Contribución al conocimiento de los neurópteros de Jaén
47	Dilar meridionalis Hagen, 1866	EUR	Spain	Andalucía	Jaén, Embalse de la Bolera			VM	Madrid	Monserrat, 1988b	Revisión de los dildridos ibéricos
47	Dilar meridionalis Hagen, 1866	EUR	Spain	Aragon	Huesca, Aneto, Río Ribagorzana	42.55°N	0.74°W	VM	Madrid	Monserrat, 2014	Los diláridos de la Península Ibérica
47	Dilar meridionalis Hagen, 1866	EUR	Spain	Aragon	Huesca, Benabarre	42.13°N	0.41°W	MNHN	Paris	Monserrat, 1986	Sobre los Neurópteros ibéricos
47	Dilar meridionalis Hagen, 1866	EUR	Spain	Aragon	Huesca, Jaca			MNHN	Paris	Monserrat, 1986	Sobre los Neurópteros ibéricos
47	Dilar meridionalis Hagen, 1866	EUR	Spain	Aragon	Huesca, Miracle			MNHN	Paris	Monserrat, 1986	Sobre los Neurópteros ibéricos
47	Dilar meridionalis Hagen, 1866	EUR	Spain	Aragon	Huesca, Eriste	42.59°N	0.49°W	MB	Barcelona	Monserrat, 2014	Los diláridos de la Península Ibérica
47	Dilar meridionalis Hagen, 1866	EUR	Spain	Aragon	Huesca, Guara	42.29°N	0.22°W	MB	Barcelona	Monserrat, 2014	Los diláridos de la Península Ibérica
47	Dilar meridionalis Hagen, 1866	EUR	Spain	Aragon	Huesca, Javierre , Embalse de Pineta	42.63°N	0.20°W	VM	Madrid	Monserrat, 2005	Nuevos datos sobre algunas pequeñas familias de neurópteros
47	Dilar meridionalis Hagen, 1866	EUR	Spain	Aragon	Huesca, Javierre			VM	Madrid	Monserrat, 2014	Los diláridos de la Península Ibérica
47	Dilar meridionalis Hagen, 1866	EUR	Spain	Aragon	Huesca, Sahún	42.59°N	0.47°W	MB	Barcelona	Monserrat, 2014	Los diláridos de la Península Ibérica
47	Dilar meridionalis Hagen, 1866	EUR	Spain	Aragon	Huesca, Sierra de Guara (mountains) near the Santuario de San Cosme	42.25°N	0.27°W			Oswald, 1998	Catalogue of the Dilaridae
47	Dilar meridionalis Hagen, 1866	EUR	Spain	Aragon	[Huesca] Valle de Ordesa	42.65°N	0.06°W			Navás, 1927	Insectos recogidos en España por el doctor F. Haas
47	Dilar meridionalis Hagen, 1866	EUR	Spain	Aragon	Huesca, Valle de Ordesa			MNCNM	Madrid	Monserrat, 1988b	Revisión de los dildridos ibéricos
47	Dilar meridionalis Hagen, 1866	EUR	Spain	Aragon	Teruel, Albarracín	40.41°N	1.41°W	VM	Madrid	Monserrat, 1988b	Revisión de los dildridos ibéricos
47	Dilar meridionalis Hagen, 1866	EUR	Spain	Aragon	Teruel, Albarracín, Fuente de la Señora			VM	Madrid	Monserrat, 2005	Nuevos datos sobre algunas pequeñas familias de neurópteros
47	Dilar meridionalis Hagen, 1866	EUR	Spain	Aragon	Teruel, Albarracín, Fuente de la Señora			VM	Madrid	Monserrat, 2005	Nuevos datos sobre algunas pequeñas familias de neurópteros
47	Dilar meridionalis Hagen, 1866	EUR	Spain	Aragon	Teruel, Albarracín, Fuente de la Señora			VM	Madrid	Monserrat, 2005	Nuevos datos sobre algunas pequeñas familias de neurópteros
47	Dilar meridionalis Hagen, 1866	EUR	Spain	Aragon	Teruel, Albarracín, Fuente de la Señora			VM	Madrid	Monserrat, 2005	Nuevos datos sobre algunas pequeñas familias de neurópteros
47	Dilar meridionalis Hagen, 1866	EUR	Spain	Aragon	Teruel, Sierra Albarracin					Morton, 1912	A collecting trip to the Camargue and the Sierra Albarracin
47	Dilar meridionalis Hagen, 1866	EUR	Spain	Aragon	Teruel, Bañón	40.50°N	1.11°W	UAH	Madrid	Díaz-Aranda & Monserrat, 1988b	Contribución al conocimiento de los neurópteros de Teruel
47	Dilar meridionalis Hagen, 1866	EUR	Spain	Aragon	Teruel, Calomarde	40.37°N	1.57°W	UAH	Madrid	Díaz-Aranda & Monserrat, 1988b	Contribución al conocimiento de los neurópteros de Teruel
47	Dilar meridionalis Hagen, 1866	EUR	Spain	Aragon	Teruel, Fuentespalda	40.80°N	0.07°W	MNHN	Paris	Monserrat, 1986	Sobre los Neurópteros ibéricos
47	Dilar meridionalis Hagen, 1866	EUR	Spain	Aragon	Teruel, Griegos	40.43°N	1.71°W	VM	Madrid	Monserrat, 1988b	Revisión de los dildridos ibéricos
47	Dilar meridionalis Hagen, 1866	EUR	Spain	Aragon	Teruel, Mora de Rubielos	40.15°N	0.45°W	UAH	Madrid	Díaz-Aranda & Monserrat, 1988b	Contribución al conocimiento de los neurópteros de Teruel
47	Dilar meridionalis Hagen, 1866	EUR	Spain	Aragon	Teruel, Orihuela del Tremedal	40.33°N	1.65°W	UAH	Madrid	Díaz-Aranda & Monserrat, 1988b	Contribución al conocimiento de los neurópteros de Teruel
47	Dilar meridionalis Hagen, 1866	EUR	Spain	Aragon	Teruel, Peñarroya [Peñarroya de Tastavins]	40.76°N	0.04°W	MNHN	Paris	Monserrat, 1986	Sobre los Neurópteros ibéricos
47	Dilar meridionalis Hagen, 1866	EUR	Spain	Aragon	Teruel, Torre de Arcas	40.75°N	0.07°W	UAH	Madrid	Díaz-Aranda & Monserrat, 1988b	Contribución al conocimiento de los neurópteros de Teruel
47	Dilar meridionalis Hagen, 1866	EUR	Spain	Castile and León	Soria, Duruelo de la Sierra			UAH	Madrid	Marín & Monserrat, 1990	Contribución al conocimiento de los neurópteros de Soria
47	Dilar meridionalis Hagen, 1866	EUR	Spain	Castile and León	Soria, Vinuesa			UAH	Madrid	Marín & Monserrat, 1990	Contribución al conocimiento de los neurópteros de Soria
47	Dilar meridionalis Hagen, 1866	EUR	Spain	Aragon	Teruel, Villar del Cobo	40.39°N	1.67°W	VM	Madrid	Monserrat, 1988b	Revisión de los dildridos ibéricos
47	Dilar meridionalis Hagen, 1866	EUR	Spain	Aragon	Zaragoza, Bujaraloz	41.49°N	0.15°W	UAH	Madrid	Marín & Monserrat, 1995	Contribución al conocimiento de los neurópteros de Zaragoza
47	Dilar meridionalis Hagen, 1866	EUR	Spain	Aragon	Zaragoza, Bujaraloz			VM	Madrid	Monserrat, 2014	Los diláridos de la Península Ibérica
47	Dilar meridionalis Hagen, 1866	EUR	Spain	Aragon	Zaragoza, Pine de Ebro, Retuerta de Pina			VM	Madrid	Monserrat, 2005	Nuevos datos sobre algunas pequeñas familias de neurópteros
47	Dilar meridionalis Hagen, 1866	EUR	Spain	Aragon	Zaragoza, Pine de Ebro, Retuerta de Pina			VM	Madrid	Monserrat, 2005	Nuevos datos sobre algunas pequeñas familias de neurópteros
47	Dilar meridionalis Hagen, 1866	EUR	Spain	Aragon	Zaragoza, Pine de Ebro, Retuerta de Pina			VM	Madrid	Monserrat, 2005	Nuevos datos sobre algunas pequeñas familias de neurópteros
47	Dilar meridionalis Hagen, 1866	EUR	Spain	Castilla–La Mancha	Cuenca, Puerto Cabrejas	40.05°N	2.35°W	VM	Madrid	Monserrat, 2014	Los diláridos de la Península Ibérica
47	Dilar meridionalis Hagen, 1866	EUR	Spain	Castilla–La Mancha	Cuenca, Ribatejada	40.65°N	3.41°W	VM	Madrid	Monserrat, 1988b	Revisión de los dildridos ibéricos
47	Dilar meridionalis Hagen, 1866	EUR	Spain	Castilla–La Mancha	[Cuenca] Sierra de Altomira, Vellisca	40.13°N	2.82°W	VM	Madrid	Monserrat, 1988b	Revisión de los dildridos ibéricos
47	Dilar meridionalis Hagen, 1866	EUR	Spain	Castilla–La Mancha	Cuenca, Valdemeca	40.22°N	1.74°W	VM	Madrid	Monserrat, 2014	Los diláridos de la Península Ibérica
47	Dilar meridionalis Hagen, 1866	EUR	Spain	Castilla–La Mancha	Cuenca, Valdemeca			VM	Madrid	Monserrat, 2014	Los diláridos de la Península Ibérica
47	Dilar meridionalis Hagen, 1866	EUR	Spain	Castilla–La Mancha	[Cuenca] Villalba de la Sierra	40.24°N	2.09°W	VM	Madrid	Monserrat, 1988b	Revisión de los dildridos ibéricos
47	Dilar meridionalis Hagen, 1866	EUR	Spain	Castilla–La Mancha	Cuenca, Villalba de la Sierra			VM	Madrid	Monserrat, 2014	Los diláridos de la Península Ibérica
47	Dilar meridionalis Hagen, 1866	EUR	Spain	Castile and León	[Segovia] Puerto de los Leones	40.71°N	4.14°W	VM	Madrid	Monserrat, 1988b	Revisión de los dildridos ibéricos
47	Dilar meridionalis Hagen, 1866	EUR	Spain	Castile and León	[Segovia] Puerto de los Leones			VM	Madrid	Monserrat, 1988b	Revisión de los dildridos ibéricos
47	Dilar meridionalis Hagen, 1866	EUR	Spain	Castile and León	Segovia, San Ildefonso [Palacio Real de La Granja de San Ildefonso, near Segovia]	40.90°N	4.00°W	MNHN	Paris	Monserrat, 1986	Sobre los Neurópteros ibéricos
47	Dilar meridionalis Hagen, 1866	EUR	Spain	Castile and León	Segovia, San Ildefonso [Palacio Real de La Granja de San Ildefonso, near Segovia]			MNCNM	Madrid	Monserrat, 1988b	Revisión de los dildridos ibéricos
47	Dilar meridionalis Hagen, 1866	EUR	Spain	Castile and León	Segovia, San Ildefonso [Palacio Real de La Granja de San Ildefonso, near Segovia]			MNHN	Paris	Monserrat, 1988b	Revisión de los dildridos ibéricos
47	Dilar meridionalis Hagen, 1866	EUR	Spain	Castile and León	Soria, San Leonardo de Yagüe	40.08°N	0.68°W	UAH	Madrid	Marín & Monserrat, 1990	Contribución al conocimiento de los neurópteros de Soria
47	Dilar meridionalis Hagen, 1866	EUR	Spain	Catalonia	Barcelona, Bellmunt	41.43°N	2.20°E	MB	Barcelona	Monserrat, 2014	Los diláridos de la Península Ibérica
47	Dilar meridionalis Hagen, 1866	EUR	Spain	Catalonia	Barcelona, Castellar del Vallés	41.62°N	2.09°E	MB	Barcelona	Monserrat, 2014	Los diláridos de la Península Ibérica
47	Dilar meridionalis Hagen, 1866	EUR	Spain	Catalonia	Barcelona, Centellas			MB	Barcelona	Monserrat, 2014	Los diláridos de la Península Ibérica
47	Dilar meridionalis Hagen, 1866	EUR	Spain	Catalonia	Barcelona, Corcó, [Santa Maria de Corcó]	42.04°N	2.37°E	MB	Barcelona	Monserrat, 2014	Los diláridos de la Península Ibérica
47	Dilar meridionalis Hagen, 1866	EUR	Spain	Catalonia	Barcelona, Corcó, [Santa Maria de Corcó]			MB	Barcelona	Monserrat, 2014	Los diláridos de la Península Ibérica
47	Dilar meridionalis Hagen, 1866	EUR	Spain	Catalonia	Barcelona, Figaró	41.72°N	2.28°E	VM	Madrid	Monserrat, 2014	Los diláridos de la Península Ibérica
47	Dilar meridionalis Hagen, 1866	EUR	Spain	Catalonia	Barcelona, Hostalets	41.40°N	2.18°E	MNHN	Paris	Monserrat, 1986	Sobre los Neurópteros ibéricos
47	Dilar meridionalis Hagen, 1866	EUR	Spain	Catalonia	Barcelona, L'Espluga de Francolí, Cami de la Peña	41.43°N	1.10°E	MB	Barcelona	Monserrat, 2014	Los diláridos de la Península Ibérica
47	Dilar meridionalis Hagen, 1866	EUR	Spain	Catalonia	Barcelona, Massanas	41.80°N	2.40°E	MNHN	Paris	Monserrat, 1986	Sobre los Neurópteros ibéricos
47	Dilar meridionalis Hagen, 1866	EUR	Spain	Catalonia	Barcelona, Montseny			MB	Barcelona	Monserrat, 2014	Los diláridos de la Península Ibérica
47	Dilar meridionalis Hagen, 1866	EUR	Spain	Catalonia	Barcelona, Montseny			MB	Barcelona	Monserrat, 2014	Los diláridos de la Península Ibérica
47	Dilar meridionalis Hagen, 1866	EUR	Spain	Catalonia	Barcelona, Montseny			MNHN	Paris	Monserrat, 1986	Sobre los Neurópteros ibéricos
47	Dilar meridionalis Hagen, 1866	EUR	Spain	Catalonia	Barcelona, Montseny			MNHN	Paris	Monserrat, 1986	Sobre los Neurópteros ibéricos
47	Dilar meridionalis Hagen, 1866	EUR	Spain	Catalonia	Barcelona, Montseny, San Marcal			UAB	Barcelona	Monserrat, 2005	Nuevos datos sobre algunas pequeñas familias de neurópteros
47	Dilar meridionalis Hagen, 1866	EUR	Spain	Catalonia	Barcelona, Santa Coloma de Gramenet	41.46°N	2.21°E	MB	Barcelona	Monserrat, 2014	Los diláridos de la Península Ibérica
47	Dilar meridionalis Hagen, 1866	EUR	Spain	Catalonia	Gerona, Falgars	42.09°N	2.44°E	PPRIP	Pretoria	Monserrat, 2005	Nuevos datos sobre algunas pequeñas familias de neurópteros
47	Dilar meridionalis Hagen, 1866	EUR	Spain	Catalonia	Gerona, Falgars d'en bas			MB	Barcelona	Monserrat, 2014	Los diláridos de la Península Ibérica
47	Dilar meridionalis Hagen, 1866	EUR	Spain	Catalonia	Gerona, Hostalets	42.10°N	2.45°E	MB	Barcelona	Monserrat, 2014	Los diláridos de la Península Ibérica
47	Dilar meridionalis Hagen, 1866	EUR	Spain	Catalonia	Gerona, Nuria	42.40°N	2.15°E	MB	Barcelona	Monserrat, 2014	Los diláridos de la Península Ibérica
47	Dilar meridionalis Hagen, 1866	EUR	Spain	Catalonia	Gerona, Rocabruna	42.34°N	2.45°E	MB	Barcelona	Monserrat, 2014	Los diláridos de la Península Ibérica
47	Dilar meridionalis Hagen, 1866	EUR	Spain	Catalonia	Gerona, Viladrau	41.85°N	2.39°E	MB	Barcelona	Monserrat, 2014	Los diláridos de la Península Ibérica
47	Dilar meridionalis Hagen, 1866	EUR	Spain	Catalonia	Lérida, Castellbó	42.37°N	1.36°E	MB	Barcelona	Monserrat, 2014	Los diláridos de la Península Ibérica
47	Dilar meridionalis Hagen, 1866	EUR	Spain	Catalonia	Lérida, Espot	42.58°N	1.09°E			Monserrat, 2014	Los diláridos de la Península Ibérica
47	Dilar meridionalis Hagen, 1866	EUR	Spain	Catalonia	Lérida, Miracle	41.91°N	1.52°E	MNHN	Paris	Monserrat, 1988b	Revisión de los dildridos ibéricos
47	Dilar meridionalis Hagen, 1866	EUR	Spain	Catalonia	Lérida, San Juan de Erm	42.42°N	1.29°E	MNHN	Paris	Monserrat, 1988b	Revisión de los dildridos ibéricos
47	Dilar meridionalis Hagen, 1866	EUR	Spain	Catalonia	Lérida, Sant Joan d'lErm			MB	Barcelona	Monserrat, 2014	Los diláridos de la Península Ibérica
47	Dilar meridionalis Hagen, 1866	EUR	Spain	Catalonia	Lérida, Sant Joan d'lErm			MB	Barcelona	Monserrat, 2014	Los diláridos de la Península Ibérica
47	Dilar meridionalis Hagen, 1866	EUR	Spain	Catalonia	Lérida, Sant Joan d'lErm			VM	Madrid	Monserrat, 2014	Los diláridos de la Península Ibérica
47	Dilar meridionalis Hagen, 1866	EUR	Spain	Catalonia	Lérida, Tavascán	42.64°N	1.26°E	MB	Barcelona	Monserrat, 2014	Los diláridos de la Península Ibérica
47	Dilar meridionalis Hagen, 1866	EUR	Spain	Catalonia	Lérida, Tuxent	42.00°N	1.17°E	MNHN	Paris	Monserrat, 1986	Sobre los Neurópteros ibéricos
47	Dilar meridionalis Hagen, 1866	EUR	Spain	Catalonia	Lérida, Tuixent			MB	Barcelona	Monserrat, 2014	Los diláridos de la Península Ibérica
47	Dilar meridionalis Hagen, 1866	EUR	Spain	Catalonia	Tarragona, Cabacés	41.25°N	0.73°E	MB	Barcelona	Monserrat, 2014	Los diláridos de la Península Ibérica
47	Dilar meridionalis Hagen, 1866	EUR	Spain	Galicia	Coruña, Pontealbar, Rio Tambre	42.96°N	8.56°W	VM	Madrid	Monserrat, 1988b	Revisión de los dildridos ibéricos
47	Dilar meridionalis Hagen, 1866	EUR	Spain	Galicia	Lugo, Pena Rubia	42.97°N	7.37°W	MNCNM	Madrid	Monserrat, 1988b	Revisión de los dildridos ibéricos
47	Dilar meridionalis Hagen, 1866	EUR	Spain	Madrid	Alpedrete	40.66°N	4.03°W	VM	Madrid	Monserrat, 1988b	Revisión de los dildridos ibéricos
47	Dilar meridionalis Hagen, 1866	EUR	Spain	Madrid	Alpedrete			VM	Madrid	Monserrat, 1988b	Revisión de los dildridos ibéricos
47	Dilar meridionalis Hagen, 1866	EUR	Spain	Madrid	Alpedrete			VM	Madrid	Monserrat, 1988b	Revisión de los dildridos ibéricos
47	Dilar meridionalis Hagen, 1866	EUR	Spain	Madrid	Alpedrete			VM	Madrid	Monserrat, 1988b	Revisión de los dildridos ibéricos
47	Dilar meridionalis Hagen, 1866	EUR	Spain	Madrid	Alpedrete			VM	Madrid	Monserrat, 1988b	Revisión de los dildridos ibéricos
47	Dilar meridionalis Hagen, 1866	EUR	Spain	Madrid	Alpedrete			VM	Madrid	Monserrat, 1988b	Revisión de los dildridos ibéricos
47	Dilar meridionalis Hagen, 1866	EUR	Spain	Madrid	Barranca de Navacerrada	40.75°N	3.99°W	VM	Madrid	Monserrat, 1988b	Revisión de los dildridos ibéricos
47	Dilar meridionalis Hagen, 1866	EUR	Spain	Madrid	Cercedilla	40.74°N	4.05°W	MNHN	Paris	Monserrat, 1986	Sobre los Neurópteros ibéricos
47	Dilar meridionalis Hagen, 1866	EUR	Spain	Madrid	Cercedilla			MNHN	Paris	Monserrat, 1988b	Revisión de los dildridos ibéricos
47	Dilar meridionalis Hagen, 1866	EUR	Spain	Madrid	Cercedilla			MNHN	Paris	Monserrat, 1988b	Revisión de los dildridos ibéricos
47	Dilar meridionalis Hagen, 1866	EUR	Spain	Madrid	El Escorial	40.59°N	4.15°W	MB	Barcelona	Monserrat, 2014	Los diláridos de la Península Ibérica
47	Dilar meridionalis Hagen, 1866	EUR	Spain	Madrid	El Escorial, Abantos, Arboreto Luis Ceballos			VM	Madrid	Monserrat, 2014	Los diláridos de la Península Ibérica
47	Dilar meridionalis Hagen, 1866	EUR	Spain	Madrid	El Escorial, Abantos, Arboreto Luis Ceballos			VM	Madrid	Monserrat, 2014	Los diláridos de la Península Ibérica
47	Dilar meridionalis Hagen, 1866	EUR	Spain	Madrid	El Escorial, Abantos, Fuente del Cervunal			VM	Madrid	Monserrat, 2014	Los diláridos de la Península Ibérica
47	Dilar meridionalis Hagen, 1866	EUR	Spain	Madrid	Escorial			MNHN	Paris	Monserrat, 1988b	Revisión de los dildridos ibéricos
47	Dilar meridionalis Hagen, 1866	EUR	Spain	Madrid	Escorial			MNCNM	Madrid	Monserrat, 1988b	Revisión de los dildridos ibéricos
47	Dilar meridionalis Hagen, 1866	EUR	Spain	Madrid	Escorial			MNCNM	Madrid	Monserrat, 1988b	Revisión de los dildridos ibéricos
47	Dilar meridionalis Hagen, 1866	EUR	Spain	Madrid	Escorial			MNCNM	Madrid	Monserrat, 1988b	Revisión de los dildridos ibéricos
47	Dilar meridionalis Hagen, 1866	EUR	Spain	Madrid	El Ventorrillo	40.41°N	3.71°W	MNCNM	Madrid	Monserrat, 2005	Nuevos datos sobre algunas pequeñas familias de neurópteros
47	Dilar meridionalis Hagen, 1866	EUR	Spain	Madrid	El Ventorrillo			MNCNM	Madrid	Monserrat, 2005	Nuevos datos sobre algunas pequeñas familias de neurópteros
47	Dilar meridionalis Hagen, 1866	EUR	Spain	Madrid	El Ventorrillo			MNCNM	Madrid	Monserrat, 2005	Nuevos datos sobre algunas pequeñas familias de neurópteros
47	Dilar meridionalis Hagen, 1866	EUR	Spain	Madrid	El Ventorrillo	40.64°N	4.16°W	VM	Madrid	Monserrat, 1988b	Revisión de los dildridos ibéricos
47	Dilar meridionalis Hagen, 1866	EUR	Spain	Madrid	El Ventorrillo			VM	Madrid	Monserrat, 1988b	Revisión de los dildridos ibéricos
47	Dilar meridionalis Hagen, 1866	EUR	Spain	Madrid	El Ventorrillo			VM	Madrid	Monserrat, 1988b	Revisión de los dildridos ibéricos
47	Dilar meridionalis Hagen, 1866	EUR	Spain	Madrid	Valley of the Fallen			VM	Madrid	Monserrat, 1988b	Revisión de los dildridos ibéricos
47	Dilar meridionalis Hagen, 1866	EUR	Spain	Madrid	Estación Alpina	40.47°N	3.68°W	MNHN	Paris	Monserrat, 1988b	Revisión de los dildridos ibéricos
47	Dilar meridionalis Hagen, 1866	EUR	Spain	Madrid	Estación Alpina			MNHN	Paris	Monserrat, 1988b	Revisión de los dildridos ibéricos
47	Dilar meridionalis Hagen, 1866	EUR	Spain	Madrid	Estación Alpina			MNHN	Paris	Monserrat, 1988b	Revisión de los dildridos ibéricos
47	Dilar meridionalis Hagen, 1866	EUR	Spain	Madrid	Estación Alpina			MNHN	Paris	Monserrat, 1988b	Revisión de los dildridos ibéricos
47	Dilar meridionalis Hagen, 1866	EUR	Spain	Madrid	La Herrería	40.58°N	4.14°W	VM	Madrid	Monserrat, 1988b	Revisión de los dildridos ibéricos
47	Dilar meridionalis Hagen, 1866	EUR	Spain	Madrid	Las Dehesas	40.76°N	4.07°W	VM	Madrid	Monserrat, 1988b	Revisión de los dildridos ibéricos
47	Dilar meridionalis Hagen, 1866	EUR	Spain	Madrid	Monte Abantos	40.62°N	4.14°W	VM	Madrid	Monserrat, 1988b	Revisión de los dildridos ibéricos
47	Dilar meridionalis Hagen, 1866	EUR	Spain	Madrid	Puerto de Cotos	40.82°N	3.96°W	VM	Madrid	Monserrat, 1988b	Revisión de los dildridos ibéricos
47	Dilar meridionalis Hagen, 1866	EUR	Spain	Madrid	Puerto de Morcuera	40.82°N	3.82°W	VM	Madrid	Monserrat, 1988b	Revisión de los dildridos ibéricos
47	Dilar meridionalis Hagen, 1866	EUR	Spain	Madrid	Fuente de la Gallega, Pto. Morcuera			VM	Madrid	Monserrat, 1988b	Revisión de los dildridos ibéricos
47	Dilar meridionalis Hagen, 1866	EUR	Spain	Madrid	Puerto de Navafría	40.98°N	3.82°W	VM	Madrid	Monserrat, 1988b	Revisión de los dildridos ibéricos
47	Dilar meridionalis Hagen, 1866	EUR	Spain	Madrid	Rascafría, Barranco del Arroyo de Santa Ana	40.90°N	3.88°W	VM	Madrid	Monserrat, 2014	Los diláridos de la Península Ibérica
47	Dilar meridionalis Hagen, 1866	EUR	Spain	Madrid	Vaciamadrid	40.36°N	3.54°W	MB	Barcelona	Monserrat, 2014	Los diláridos de la Península Ibérica
47	Dilar meridionalis Hagen, 1866	EUR	Spain	Valencia	Castellón, Barracas	40.01°N	0.69°W	UAH	Madrid	Monserrat & Díaz-Aranda, 1988	Contribución al conocimiento de los neurópteros de Castellón
47	Dilar meridionalis Hagen, 1866	EUR	Spain	Valencia	Castellón, Pobleta	39.84°N	0.82°W	UAH	Madrid	Monserrat & Díaz-Aranda, 1988	Contribución al conocimiento de los neurópteros de Castellón
48	Dilar miralobatus Li, U. Aspöck, H. Aspöck & Liu, 2020	ASI	Sri Lanka	North Central	Anu[radhapura] Dist[rict]. Irrigation Bungalow Padaviya	8.84°N	80.75°E	PCWH	Farnham	Li et al., 2020	Dilar from South Asia
48	Dilar miralobatus Li, U. Aspöck, H. Aspöck & Liu, 2020	ASI	Sri Lanka	North Central	Anu[radhapura] Dist[rict]. Wildlife Soc. Bungalow Hunuwilagama, Wilpattu	8.46°N	80.04°E	PCWH	Farnham	Li et al., 2020	Dilar from South Asia
49	Dilar montanus Yang, 1992	ASI	China	Sichuan	Xiangcheng County, Zhongrewu [乡城县中热乌]	29.1°N	99.72°E	CAU	Beijing	Zhang et al., 2015	Dilar from Southern China
49	Dilar montanus Yang, 1992	ASI	China	Yunnan	Binchuan County, Mt. Jizushan [宾川县鸡足山]	25.98°N	100.38°E	CAU	Beijing
49	Dilar montanus Yang, 1992	ASI	China	Yunnan	Lijiang, Gaoshan Botanical Garden [丽江高山植物园]	27°N	100.18°E	IZCAS	Beijing	Zhang et al., 2015	Dilar from Southern China
49	Dilar montanus Yang, 1992	ASI	China	Yunnan	Ninglang County, Luguhu [泸沽湖大渔坝]	28.15°N	101.25°E	CAU	Beijing	Zhang et al., 2015	Dilar from Southern China
49	Dilar montanus Yang, 1992	ASI	China	Yunnan	Ninglang County, Luguhu, near gate [泸沽湖近大门]	27.66°N	100.81°E	CAU	Beijing
49	Dilar montanus Yang, 1992	ASI	China	Yunnan	Ninglang County, Luguhu, near gate [泸沽湖近大门]			CAU	Beijing
49	Dilar montanus Yang, 1992	ASI	China	Yunnan	Ninglang County, Luguhu, Langfang [泸沽湖蒗放]			CAU	Beijing
49	Dilar montanus Yang, 1992	ASI	China	Yunnan	Ninglang County, Luguhu, Axiayougu Canyon [泸沽湖阿夏幽谷]			CAU	Beijing
49	Dilar montanus Yang, 1992	ASI	China	Yunnan	Zhongdian County, Wengshui [中甸县翁水]	28.35°N	99.72°E	CAU	Beijing	Zhang et al., 2015	Dilar from Southern China
50	Dilar muliensis Li & Liu, 2020	ASI	China	Sichuan	Liangshan State, Muli County, Boke Township [凉山州木里县博科乡]	28.1°N	100.93°E	CAU	Beijing	Li & Liu, 2020	Dilar from Mts. Hengduan
50	Dilar muliensis Li & Liu, 2020	ASI	China	Sichuan	Liangshan State, Muli County, Guzengmiaozu Township [凉山州木里县固增苗族乡]	28.26°N	100.86°E	CAU	Beijing
50	Dilar muliensis Li & Liu, 2020	ASI	China	Sichuan	Liangshan State, Muli County, Keer Township, Songjiagou [凉山州木里县克尔乡宋家沟]	28.05°N	101.02°E	CAU	Beijing	Li & Liu, 2020	Dilar from Mts. Hengduan
50	Dilar muliensis Li & Liu, 2020	ASI	China	Sichuan	Liangshan State, Muli County, Keer Township, Songjiagou [凉山州木里县克尔乡宋家沟]			CAU	Beijing	Li & Liu, 2020	Dilar from Mts. Hengduan
51	Dilar nevadensis Rambur, 1838	EUR	Spain	Andalucía	Granada, Sierra Nevada (mountains), near Granada	37.17°N	3.58°W	ISNB	Brussels	Oswald, 1998	Catalogue of the Dilaridae
52	Dilar nietneri Hagen, 1858	ASI	Sri Lanka	Central	Rainbodde' [Ramboda village]	7.06°N	80.7°E	MFN	Berlin	Oswald, 1998	Catalogue of the Dilaridae
53	Dilar nobilis Zhang, Liu, H. Aspöck & U. Aspöck, 2015	ASI	China	Yunnan	Lvchun, Mt. Huanglianshan [绿春黄连山]	22.88°N	102.3°E	CAU	Beijing	Zhang et al., 2015	Dilar from Southern China
53	Dilar nobilis Zhang, Liu, H. Aspöck & U. Aspöck, 2015	ASI	China	Yunnan	Xishuangbanna, Menghun Town [西双版纳勐混镇]	21.83°N	100.38°E	IZCAS	Beijing	Zhang et al., 2015	Dilar from Southern China
53	Dilar nobilis Zhang, Liu, H. Aspöck & U. Aspöck, 2015	ASI	Laos	Phongsaly	Stadt Phongsaly, Umegebung	21.68°N	102.12°E	HUAC	Vienna
54	Dilar nujianganus Li, H. Aspöck, U. Aspöck & Liu, 2021	ASI	China	Yunnan	Mt. Gaoligongshan, Nujiang Prefecture, Nujiang State Nature Reserve, No. 12 Bridge Camp area, 16.3 airkm W of Gongshan [高黎贡山自然保护区怒江片区]	27.72°N	98.5°E	CASC	San Francisco
55	Dilar ohli Zhang, Liu, Aspöck & Aspöck in Zhang et al., 2016	ASI	Vietnam	Lang Son	Tonkin, Montes Mauson [a locality in Lang Son Province, Vietnam]	21.86°N	106.75°E	MFN	Berlin	Zhang et al., 2016	Dilar from Southeast Asia
56	Dilar pallidus Nakahara, 1955	ASI	China	Taiwan	Nantou: Sungkang ('Tattaka') [南投松岗]	24.09°N	121.17°E	NSMT	Tokyo	Nakahara, 1955b	Dilaridae of Japan and Formosa (Neuroptera)
57	Dilar parthenopaeus Costa, 1855	EUR	France	Corsica	Albertacce,'val du Niellu' forest	42.27°N	8.93°E			Giacomino, 2016	Un Névroptère nouveau pour la faune de France
57	Dilar parthenopaeus Costa, 1855	EUR	France	Corsica	Évisa, Aïtone forest	42.31°N	8.85°E			Giacomino, 2016	Un Névroptère nouveau pour la faune de France
57	Dilar parthenopaeus Costa, 1855	EUR	Italy	Basilicata	[Potenza] Aritzo	40.80°N	15.73°E			Navás, 1909	Monografía de la familia de los Diláridos
57	Dilar parthenopaeus Costa, 1855	EUR	Italy	Campania	Napoli	40.83°N	14.25°E			Costa, 1860–1870	Fauna del Regno di Napoli
57	Dilar parthenopaeus Costa, 1855	EUR	Italy	Campania	Salerno [province], Cava de′ Tirreni	40.68°N	14.70°E	MZUN	Napoli	Oswald, 1998	Catalogue of the Dilaridae
57	Dilar parthenopaeus Costa, 1855	EUR	Italy	Campania	Salerno [province], Monti della Cava [prob. Cava de' Tirreni]					Letardi, 2002	A web page on Italian Neuropterida
57	Dilar parthenopaeus Costa, 1855	EUR	Italy	Lazio	Lepini moutains	41.57°N	13.07°E			Pantaleoni & Letardi, 1996	A remarkable brachypterous female of Dilaridae
57	Dilar parthenopaeus Costa, 1855	EUR	Italy	Sardinia	[Nuoro] Aritzo	39.95°N	9.20°E			Navás, 1909	Monografía de la familia de los Diláridos
57	Dilar parthenopaeus Costa, 1855	EUR	Italy	Sardinia	Nuoro, Cerdeña, Belvi	39.98°N	9.18°E	MG	Genova	Monserrat, 2005	Nuevos datos sobre algunas pequeñas familias de neurópteros
58	Dilar phraenus Li, H. Aspöck, U. Aspöck & Liu, 2021	ASI	Thailand	Phrae	Wieng Ko Sai National Park, upper Huai Panjane	17.56°N	99.34°E	CASC	San Francisco
59	Dilar pumilus Navás, 1903	EUR	Portugal	Coimbra	Região de Coimbra, Serra da Lousã	40.07°N	8.24°W			Letardi, 2012	Two new lacewings for Continental Portugal (Neuroptera)
59	Dilar pumilus Navás, 1903	EUR	Spain	Castilla–La Mancha	Albacete, EI Bonillo	38.95°N	2.54°W			Marín, 1994	Las comunidades de neuropterós de la provincia de Albacete
59	Dilar pumilus Navás, 1903	EUR	Spain	Castilla–La Mancha	Albacete, Peñas de San Pedro	38.73°N	2.00°W			Marín, 1994	Las comunidades de neuropterós de la provincia de Albacete
59	Dilar pumilus Navás, 1903	EUR	Spain	Andalucía	Cabra, Ermita de la Virgen de la Sierra	37.49°N	4.38°W	VM	Madrid	Monserrat, 2005	Nuevos datos sobre algunas pequeñas familias de neurópteros
59	Dilar pumilus Navás, 1903	EUR	Spain	Andalucía	Córdoba, Santa María Trasierra, Finca EI Salado	37.93°N	4.90°W	VM	Madrid	Monserrat, 2005	Nuevos datos sobre algunas pequeñas familias de neurópteros
59	Dilar pumilus Navás, 1903	EUR	Spain	Andalucía	Córdoba, Villaviciosa [town]	38.01°N	5.00°W	VM	Madrid	Monserrat, 2005	Nuevos datos sobre algunas pequeñas familias de neurópteros
59	Dilar pumilus Navás, 1903	EUR	Spain	Andalucía	Granada, Haza del Lino	36.81°N	3.31°W	VM	Madrid	Monserrat, 2013	Los insectos de Sierra Nevada
59	Dilar pumilus Navás, 1903	EUR	Spain	Andalucía	Granada, Haza del Lino			VM	Madrid	Monserrat, 2014	Los diláridos de la Península Ibérica
59	Dilar pumilus Navás, 1903	EUR	Spain	Andalucía	Granada, Sierra de Alfacar	37.25°N	3.56°W	BNHM	London	Monserrat, 1988b	Revisión de los dildridos ibéricos
59	Dilar pumilus Navás, 1903	EUR	Spain	Andalucía	Granada, Sierra Nevada, Carretera del Veleta	37.06°N	3.36°W	BNHM	London	Monserrat, 1988b	Revisión de los dildridos ibéricos
59	Dilar pumilus Navás, 1903	EUR	Spain	Andalucía	Huelva, Cumbres de Enmedio	38.07°N	6.69°W	VM	Madrid	Monserrat, 2005	Nuevos datos sobre algunas pequeñas familias de neurópteros
59	Dilar pumilus Navás, 1903	EUR	Spain	Andalucía	Jaén, Isabela	38.24°N	3.60°W	VM	Madrid	Monserrat, 1988b	Revisión de los dildridos ibéricos
59	Dilar pumilus Navás, 1903	EUR	Spain	Andalucía	Jaén, Sierra Morena, Lugarnuevo	38.37°N	3.83°W	VM	Madrid	Monserrat, 2005	Nuevos datos sobre algunas pequeñas familias de neurópteros
59	Dilar pumilus Navás, 1903	EUR	Spain	Castilla–La Mancha	Ciudad Real, Castillo de Calatrava la Nueva	38.67°N	3.85°W	VM	Madrid	Monserrat, 2014	Los diláridos de la Península Ibérica
59	Dilar pumilus Navás, 1903	EUR	Spain	Castile and León	Salamanca, Espeja	40.56°N	6.72°W	VM	Madrid	Monserrat, 1988b	Revisión de los dildridos ibéricos
59	Dilar pumilus Navás, 1903	EUR	Spain	Castile and León	Salamanca, Gargabete	40.97°N	5.65°W	VM	Madrid	Monserrat, 1988b	Revisión de los dildridos ibéricos
59	Dilar pumilus Navás, 1903	EUR	Spain	Castile and León	Salamanca, Los Picones	41.00°N	6.54°W	VM	Madrid	Monserrat, 1988b	Revisión de los dildridos ibéricos
59	Dilar pumilus Navás, 1903	EUR	Spain	Castile and León	Salamanca, Porteros	40.99°N	5.84°W	VM	Madrid	Monserrat, 1988b	Revisión de los dildridos ibéricos
59	Dilar pumilus Navás, 1903	EUR	Spain	Castile and León	Salamanca, Villaseca de los Gamitos	41.04°N	6.11°W	VM	Madrid	Monserrat, 1988b	Revisión de los dildridos ibéricos
59	Dilar pumilus Navás, 1903	EUR	Spain	Extremadura	Badajoz, Presa de Proserpina	38.97°N	6.37°W	VM	Madrid	Monserrat, 2005	Nuevos datos sobre algunas pequeñas familias de neurópteros
59	Dilar pumilus Navás, 1903	EUR	Spain	Extremadura	Cáceres, Oliva de Plasencia	40.11°N	6.08°W	VM	Madrid	Monserrat, 1988b	Revisión de los dildridos ibéricos
59	Dilar pumilus Navás, 1903	EUR	Spain	Extremadura	Cáceres, Río Salor	39.66°N	7.06°W	VM	Madrid	Monserrat, 1988b	Revisión de los dildridos ibéricos
59	Dilar pumilus Navás, 1903	EUR	Spain	Extremadura	Cáceres, Salvatierra de Santiago	39.31°N	6.03°W	VM	Madrid	Monserrat, 2005	Nuevos datos sobre algunas pequeñas familias de neurópteros
59	Dilar pumilus Navás, 1903	EUR	Spain	Extremadura	Cáceres, Valdehuncar	39.84°N	5.52°W	VM	Madrid	Monserrat, 1988b	Revisión de los dildridos ibéricos
59	Dilar pumilus Navás, 1903	EUR	Spain	Murcia	near Cartagena	37.60°N	0.98°W	MNHN	Paris	Oswald, 1998	Catalogue of the Dilaridae
59	Dilar pumilus Navás, 1903	EUR	Spain	Murcia	[holotype of Lidar pumilus] near Cartagena			MNHN	Paris	Monserrat, 1986	Sobre los Neurópteros ibéricos
59	Dilar pumilus Navás, 1903	EUR	Spain	Murcia	Casa de la Carrasca	38.08°N	1.95°W	VM	Madrid	Monserrat, 1988b	Revisión de los dildridos ibéricos
60	Dilar punctulosus Li & Liu, 2020	ASI	China	Sichuan	Liangshan State, Muli County, Shawan Township, Nawa Village, near Wujiahegou [凉山州木里县沙湾乡纳瓦村，近五家河沟]	28.25°N	100.9°E	CAU	Beijing	Li & Liu, 2020	Dilar from Mts. Hengduan
60	Dilar punctulosus Li & Liu, 2020	ASI	China	Sichuan	Ganzi State, Yajiang County, Gexigou Natural Reserve [甘孜州雅江县格西沟自然保护区]	30.05°N	100.96°E	CAU	Beijing
60	Dilar punctulosus Li & Liu, 2020	ASI	China	Sichuan	Ganzi State, Xiangcheng County, Niding Canyon [甘孜州乡城县尼丁峡谷]	29.08°N	99.67°E	CAU	Beijing
60	Dilar punctulosus Li & Liu, 2020	ASI	China	Sichuan	Ganzi State, Daocheng County, Rihuo Village [甘孜州稻城县日火村]	29.04°N	100.55°E	CAU	Beijing
61	Dilar rauschorum Li, H. Aspöck, U. Aspöck & Liu, 2021	ASI	Thailand	Mae Hong Son	S[outh]E[ast] Passhöhe zwischen Pai und Soppong [between Pai Town and Soppong Village]	19.44°N	98.33°E	CHRR	Scheibbs
62	Dilar rotundatus Zhang, Liu & Winterton in Zhang et al., 2016	ASI	Thailand	Loei	Phu Ruea NP, Pha Lon Noi	17.51°N	101.57°E	CAU	Beijing	Zhang et al., 2016	Dilar from Southeast Asia
63	Dilar saldubensis Navás, 1902	EUR	Spain	Aragon	Zaragoza (=Saragossa)	41.65°N	0.9°W	MNHN	Paris	Oswald, 1998	Catalogue of the Dilaridae
63	Dilar saldubensis Navás, 1902	EUR	Spain	Aragon	Zaragoza, Cadrete, junto al apeadero de la línea de Cariñena	41.55°N	0.96°W			Navás, 1903	Diláridos de España
63	Dilar saldubensis Navás, 1902	EUR	Spain	Aragon	Zaragoza, Valdespartera	41.62°N	0.93°W			Navás, 1909	Monografía de la familia de los Diláridos
63	Dilar saldubensis Navás, 1902	EUR	Spain	Aragon	Zaragoza, Valdespartera					Navás, 1909	Monografía de la familia de los Diláridos
63	Dilar saldubensis Navás, 1902	EUR	Spain	Aragon	Zaragoza			MNHN	Paris	Monserrat, 1988b	Revisión de los dildridos ibéricos
63	Dilar saldubensis Navás, 1902	EUR	Spain	Aragon	Zaragoza			MNHN	Paris	Monserrat, 1986	Sobre los Neurópteros ibéricos
63	Dilar saldubensis Navás, 1902	EUR	Spain	Aragon	Zaragoza			MB	Barcelona	Monserrat, 2014	Los diláridos de la Península Ibérica
63	Dilar saldubensis Navás, 1902	EUR	Spain	Aragon	Zaragoza			MNHN	Paris	Monserrat, 1988b	Revisión de los dildridos ibéricos
63	Dilar saldubensis Navás, 1902	EUR	Spain	Aragon	Zaragoza			MNHN	Paris	Monserrat, 1986	Sobre los Neurópteros ibéricos
63	Dilar saldubensis Navás, 1902	EUR	Spain	Castilla–La Mancha	Ciudad Real, Pozuelo de Calatrava	38.92°N	3.83°W	MNHN	Paris	Oswald, 1998	Catalogue of the Dilaridae
63	Dilar saldubensis Navás, 1902	EUR	Spain	Castilla–La Mancha	Ciudad Real, Pozuelo de los Castaños			VM	Madrid	Monserrat, 1988b	Revisión de los dildridos ibéricos
63	Dilar saldubensis Navás, 1902	EUR	Spain	Castilla–La Mancha	Ciudad Real, Pozuelo, s. f.			MB	Barcelona	Monserrat, 2014	Los diláridos de la Península Ibérica
63	Dilar saldubensis Navás, 1902	EUR	Spain	Castilla–La Mancha	Ciudad Real, Pozuelo, s. f.			MB	Barcelona	Monserrat, 2014	Los diláridos de la Península Ibérica
63	Dilar saldubensis Navás, 1902	EUR	Spain	Castilla–La Mancha	Ciudad Real, Pozuelo			MNHN	Paris	Monserrat, 1986	Sobre los Neurópteros ibéricos
63	Dilar saldubensis Navás, 1902	EUR	Spain	Extremadura	Caceres, Jaraiceijo	39.67°N	5.81°W	VM	Madrid	Monserrat, 2005	Nuevos datos sobre algunas pequeñas familias de neurópteros
63	Dilar saldubensis Navás, 1902	EUR	Spain	Extremadura	Caceres, Berzocana	39.44°N	5.46°W	VM	Madrid	Monserrat, 1988b	Revisión de los dildridos ibéricos
63	Dilar saldubensis Navás, 1902	EUR	Portugal	Bragança	França, Ria Sabor	41.81°N	6.76°W	VM	Madrid	Monserrat, 2005	Nuevos datos sobre algunas pequeñas familias de neurópteros
63	Dilar saldubensis Navás, 1902	EUR	Portugal	Bragança	Rio Baceiro, Castrelos	41.93°N	6.86°W	VM	Madrid	Monserrat, 1988b	Revisión de los dildridos ibéricos
63	Dilar saldubensis Navás, 1902	EUR	Portugal	Braga	Martim, Rio Tinhela	41.39°N	7.45°W	VM	Madrid	Monserrat, 2005	Nuevos datos sobre algunas pequeñas familias de neurópteros
63	Dilar saldubensis Navás, 1902	EUR	Portugal	Porto	Amarante, Serra do Marao, Torno, Riberiro de Ramalhoso	41.32°N	7.84°W	VM	Madrid	Monserrat, 2005	Nuevos datos sobre algunas pequeñas familias de neurópteros
63	Dilar saldubensis Navás, 1902	EUR	Portugal	Leiria	Karte 85, P283	39.50°N	9.00°W			Aspöck, H. et al, 1980	Die Neuropteren Europas
64	Dilar septentrionalis Navás, 1912	ASI	China	Jilin	Jiaohe, Mt. Lafashan [蛟河拉法山]	43.7°N	127.2°E	CAU	Beijing	Zhang et al., 2014a	Dilar from northern China
64	Dilar septentrionalis Navás, 1912	ASI	China	Liaoning	Huanren County [Laotuzi Natural Reserve] [桓仁老秃子自然保护区]	41.25°N	125.35°E	CAU	Beijing	Zhang et al., 2014a	Dilar from northern China
64	Dilar septentrionalis Navás, 1912	ASI	China	Liaoning	Kuandian County, Mt. tianhuashan [宽甸天华山]	40.72°N	124.77°E	CAU	Beijing	Zhang et al., 2014a	Dilar from northern China
64	Dilar septentrionalis Navás, 1912	ASI	China	Liaoning	Kuandian County, Quanshan Forest Farm [宽甸泉山林场]	40.98°N	124.57°E	CAU	Beijing
64	Dilar septentrionalis Navás, 1912	ASI	China	Liaoning	Xinbin [Douling Forest Farm] [新宾陡岭林场]	41.23°N	124.25°E	CAU	Beijing	Zhang et al., 2014a	Dilar from northern China
64	Dilar septentrionalis Navás, 1912	ASI	Russia	Amur	Виноградовка [Vinogradovka]	50.31°N	129.44°E			Zakharenko, 1988	Neuroptera of the fauna of the USSR. II. Fam. Dilaridae, Berothidae and Sisyridae
64	Dilar septentrionalis Navás, 1912	ASI	Russia	Primorskiy	Eugenievka [Spassk-Dalny]	44.60°N	132.82°E	MNHN	Paris	Navás, 1925	Les dilarides (Ins. Névroptères) du Muséum National de Paris
64	Dilar septentrionalis Navás, 1912	ASI	Russia	Primorskiy	Evgenievka [Spassk-Dalny]					Navás, 1912	Quelques Nevroptères de la Sibérie méridionale-orientale
64	Dilar septentrionalis Navás, 1912	ASI	Russia	Primorskiy	Evgenievka [Spassk-Dalny]					Navás, 1912	Quelques Nevroptères de la Sibérie méridionale-orientale
64	Dilar septentrionalis Navás, 1912	ASI	Russia	Primorskiy	Evgenievka [Spassk-Dalny]					Navás, 1912	Quelques Nevroptères de la Sibérie méridionale-orientale
64	Dilar septentrionalis Navás, 1912	ASI	Russia	Primorskiy	Kamen-Rybolov	44.74°N	132.04°E			Navás, 1912	Quelques Nevroptères de la Sibérie méridionale-orientale
64	Dilar septentrionalis Navás, 1912	ASI	Russia	Primorskiy	заповедник Кедровая Падь [Kedrovaya Pad Nature Reserve]	43.08°N	131.50°E			Zakharenko, 1988	Neuroptera of the fauna of the USSR. II. Fam. Dilaridae, Berothidae and Sisyridae
64	Dilar septentrionalis Navás, 1912	ASI	Russia	Primorskiy	заповедник Кедровая Падь [Kedrovaya Pad Nature Reserve]					Zakharenko, 1988	Neuroptera of the fauna of the USSR. II. Fam. Dilaridae, Berothidae and Sisyridae
64	Dilar septentrionalis Navás, 1912	ASI	Russia	Primorskiy	заповедник Кедровая Падь [Kedrovaya Pad Nature Reserve]					Zakharenko, 1988	Neuroptera of the fauna of the USSR. II. Fam. Dilaridae, Berothidae and Sisyridae
64	Dilar septentrionalis Navás, 1912	ASI	Russia	Primorskiy	заповедник Кедровая Падь [Kedrovaya Pad Nature Reserve]					Zakharenko, 1988	Neuroptera of the fauna of the USSR. II. Fam. Dilaridae, Berothidae and Sisyridae
64	Dilar septentrionalis Navás, 1912	ASI	Russia	Primorskiy	Лримopский кp., Xacaнcкий p-н, n-ocтpoвГамoba, б. Teдякoвcкoro Cинёв C. [Primorskiy, Far East, Khasan]	42.55°N	130.65°E	CAU	Beijing
64	Dilar septentrionalis Navás, 1912	ASI	Russia	Primorskiy	Рязановка [Ryazanovka, Region Primorje]	42.96°N	131.24°E			Zakharenko, 1988	Neuroptera of the fauna of the USSR. II. Fam. Dilaridae, Berothidae and Sisyridae
64	Dilar septentrionalis Navás, 1912	ASI	Russia	Primorskiy	ст.Тигровая [Tigrovaya]	43.17°N	133.25°E			Zakharenko, 1988	Neuroptera of the fauna of the USSR. II. Fam. Dilaridae, Berothidae and Sisyridae
64	Dilar septentrionalis Navás, 1912	ASI	Russia	Primorskiy	Уссурийск [Ussuriysk]	43.80°N	131.97°E			Zakharenko, 1988	Neuroptera of the fauna of the USSR. II. Fam. Dilaridae, Berothidae and Sisyridae
64	Dilar septentrionalis Navás, 1912	ASI	Russia	Primorskiy	Vladivostok	43.15°N	131.88°E	MNHN	Paris	Monserrat, 1988a	Revision de la obra de L. Navás, I
64	Dilar septentrionalis Navás, 1912	ASI	Russia	Primorskiy	Vladivostok			MNHN	Paris	Monserrat, 1988a	Revision de la obra de L. Navás, I
64	Dilar septentrionalis Navás, 1912	ASI	Russia	Primorskiy	Приморский край, Яковлевка [Primorsky Krai, Yakovlevka]	44.42°N	133.48°E			Zakharenko, 1988	Neuroptera of the fauna of the USSR. II. Fam. Dilaridae, Berothidae and Sisyridae
65	Dilar sinicus Nakahara, 1957	ASI	China	Gansu	Dangchang [宕昌]	33.77°N	104.02°E	CAU	Beijing	Zhang et al., 2014a	Dilar from northern China
65	Dilar sinicus Nakahara, 1957	ASI	China	Hebei	Yuxian, Mt.Xiaowutaishan, Jinhekou [蔚县小五台山金河口]	39.83°N	114.78°E	CAU	Beijing	Zhang et al., 2014a	Dilar from northern China
65	Dilar sinicus Nakahara, 1957	ASI	China	Neimenggu	Autonomous Region, Mt. Helanshan, Shuimogou [贺兰山水磨沟]	38.9°N	105.97°E	CAU	Beijing	Zhang et al., 2014a	Dilar from northern China
65	Dilar sinicus Nakahara, 1957	ASI	China	Neimenggu	Autonomous Region, Mt. Helanshan, Halawu [贺兰山哈拉乌北沟]	38.96°N	106.03°E	CAU	Beijing
65	Dilar sinicus Nakahara, 1957	ASI	China	Neimenggu	Autonomous Region, Mt. Helanshan, Yaoba, Xiazigou [贺兰山腰坝霞子沟]			CAU	Beijing
65	Dilar sinicus Nakahara, 1957	ASI	China	Neimenggu	Autonomous Region, Mt. Helanshan, Yaoba, Xuelingzi [贺兰山腰坝雪岭子]			CAU	Beijing
65	Dilar sinicus Nakahara, 1957	ASI	China	Shanxi	between Henglingkuan Village and Wangmaoc[z]hen Town [横岭关和王茅镇之间]	35.42°N	111.6°E	NSMT	Tokyo	Oswald, 1998	Catalogue of the Dilaridae
65	Dilar sinicus Nakahara, 1957	ASI	China	Shanxi	Xixian [隰县]	36.5°N	110.92°E	CAU	Beijing	Zhang et al., 2014a	Dilar from northern China
65	Dilar sinicus Nakahara, 1957	ASI	China	Shanxi	Daning [大宁]	36.27°N	110.45°E	CAU	Beijing	Zhang et al., 2014a	Dilar from northern China
65	Dilar sinicus Nakahara, 1957	ASI	China	Shaanxi	Mt. Huashan, Qingkeping [华山青柯坪]	34.82°N	110.15°E	CAU	Beijing	Zhang et al., 2014a	Dilar from northern China
65	Dilar sinicus Nakahara, 1957	ASI	China	Shaanxi	Mt. Huashan, Ganquan, Qingquangou [华山甘泉清泉沟]	36.47°N	109.58°E	CAU	Beijing	Zhang et al., 2014a	Dilar from northern China
65	Dilar sinicus Nakahara, 1957	ASI	China	Shaanxi	Ganquan, Qingquan Town [甘泉清泉镇]	36.28°N	109.51°E	CAU	Beijing
65	Dilar sinicus Nakahara, 1957	ASI	China	Shaanxi	Yan-an [延安]	35.35°N	107.68°E	CAU	Beijing	Zhang et al., 2014a	Dilar from northern China
65	Dilar sinicus Nakahara, 1957	ASI	China	Shaanxi	Dingbian [定边]	36.82°N	107.25°E	CAU	Beijing	Zhang et al., 2014a	Dilar from northern China
65	Dilar sinicus Nakahara, 1957	ASI	China	Shaanxi	Ningshan County, Niubeiliang [宁陕县牛背梁]	33.82°N	108.83°E	CAU	Beijing
65	Dilar sinicus Nakahara, 1957	ASI	China	Shaanxi	Ankang City, Ningshan County, Huoditang [安康市宁陕县火地塘]	33.43°N	108.45°E	CAU	Beijing
65	Dilar sinicus Nakahara, 1957	ASI	China	Shaanxi	Mei County, Haoping Temple [眉县蒿坪寺]	33.98°N	107.65°E	CAU	Beijing
66	Dilar spectabilis Zhang, Liu, H. Aspöck & U. Aspöck, 2014	ASI	China	Gansu	Pingliang, Mt. Kongdongshan [平凉市崆峒山]	34.9°N	108.5°E	CAU	Beijing	Zhang et al., 2014a	Dilar from northern China
66	Dilar spectabilis Zhang, Liu, H. Aspöck & U. Aspöck, 2014	ASI	China	Gansu	Danchang [宕昌]	34.03°N	104.38°E	CAU	Beijing	Zhang et al., 2014a	Dilar from northern China
66	Dilar spectabilis Zhang, Liu, H. Aspöck & U. Aspöck, 2014	ASI	China	Gansu	Tianshui City, Dangchuan Forestry, Maicaogou [天水党川林场麦草沟]	34.41°N	106.15°E	CAU	Beijing
66	Dilar spectabilis Zhang, Liu, H. Aspöck & U. Aspöck, 2014	ASI	China	Henan	Luanchuan, Longyuwan [栾川龙峪湾]	33.78°N	111.6°E	CAU	Beijing	Zhang et al., 2014a	Dilar from northern China
66	Dilar spectabilis Zhang, Liu, H. Aspöck & U. Aspöck, 2014	ASI	China	Ningxia	Autonomous Region, Mt. Liupanshan, Xiaonanchuan [六盘山小南川]	35.48°N	106.33°E	CAU	Beijing	Zhang et al., 2014a	Dilar from northern China
66	Dilar spectabilis Zhang, Liu, H. Aspöck & U. Aspöck, 2014	ASI	China	Ningxia	Autonomous Region, Mt. Liupanshan, Erlonghe [六盘山二龙河]			CAU	Beijing	Zhang et al., 2014a	Dilar from northern China
66	Dilar spectabilis Zhang, Liu, H. Aspöck & U. Aspöck, 2014	ASI	China	Ningxia	Autonomous Region, Mt. Liupanshan, Guimenguan [六盘山鬼门关]			CAU	Beijing
66	Dilar spectabilis Zhang, Liu, H. Aspöck & U. Aspöck, 2014	ASI	China	Ningxia	Guyuan City, Jingyuan County, Longtan Forestry [固原市泾源县龙潭林场]	35.39°N	106.35°E	CAU	Beijing
66	Dilar spectabilis Zhang, Liu, H. Aspöck & U. Aspöck, 2014	ASI	China	Shaanxi	Mt. Taibaishan, Dadian [太白山大殿]	33.98°N	107.65°E	CAU	Beijing	Zhang et al., 2014a	Dilar from northern China
66	Dilar spectabilis Zhang, Liu, H. Aspöck & U. Aspöck, 2014	ASI	China	Shaanxi	Mt. Taibaishan, Haopingsi [太白山蒿坪寺]			CAU	Beijing	Zhang et al., 2014a	Dilar from northern China
66	Dilar spectabilis Zhang, Liu, H. Aspöck & U. Aspöck, 2014	ASI	China	Shaanxi	Mt. Taibaishan, Zhongshansi [太白山中山寺]			CAU	Beijing	Zhang et al., 2014a	Dilar from northern China
66	Dilar spectabilis Zhang, Liu, H. Aspöck & U. Aspöck, 2014	ASI	China	Shaanxi	Mt. Taibaishan, Erlitou [太白山二里头]	33.95°N	107.77°E	CAU	Beijing
66	Dilar spectabilis Zhang, Liu, H. Aspöck & U. Aspöck, 2014	ASI	China	Shaanxi	Zhouzhi County, Mt. Taibaishan [周至县太白山]			CAU	Beijing
66	Dilar spectabilis Zhang, Liu, H. Aspöck & U. Aspöck, 2014	ASI	China	Shaanxi	Zhouzhi County, Houzhenzi [周至县厚畛子]	33.85°N	107.84°E	CAU	Beijing
66	Dilar spectabilis Zhang, Liu, H. Aspöck & U. Aspöck, 2014	ASI	China	Shaanxi	Foping, Longcaoping [佛坪龙草坪]	33.27°N	109.68°E	CAU	Beijing	Zhang et al., 2014a	Dilar from northern China
66	Dilar spectabilis Zhang, Liu, H. Aspöck & U. Aspöck, 2014	ASI	China	Shaanxi	Qinling, Huoditang [秦岭火地塘]	33.43°N	108.45°E	CAU	Beijing
66	Dilar spectabilis Zhang, Liu, H. Aspöck & U. Aspöck, 2014	ASI	China	Shaanxi	[Xi-an City] Huyi [District], Changping [鄠邑长坪]	33.79°N	108.57°E	CAU	Beijing
66	Dilar spectabilis Zhang, Liu, H. Aspöck & U. Aspöck, 2014	ASI	China	Shaanxi	Xi-an City, Huyi District, Zhuque Natural Forest Park [西安鄂邑区朱雀国家森林保护公园]	33.8°N	108.58°E	CAU	Beijing
66	Dilar spectabilis Zhang, Liu, H. Aspöck & U. Aspöck, 2014	ASI	China	Sichuan	Leshan, Mt. Emeishan [Jiulaodong] [峨眉山]	29.51°N	103.38°E	CAU	Beijing	Zhang et al., 2015	Dilar from Southern China
66	Dilar spectabilis Zhang, Liu, H. Aspöck & U. Aspöck, 2014	ASI	China	Sichuan	Leshan, Mt. Emeishan [峨眉山]	29.52°N	103.34°E	HUAC	Vienna	Zhang et al., 2015	Dilar from Southern China
66	Dilar spectabilis Zhang, Liu, H. Aspöck & U. Aspöck, 2014	ASI	China	Sichuan	Mt. Emeishan, Jiulaodong [峨眉山九老洞]			CAU	Beijing
66	Dilar spectabilis Zhang, Liu, H. Aspöck & U. Aspöck, 2014	ASI	China	Sichuan	Pingwu County, Wanglang Natural Reserve [平武县王朗自然保护区]	32.19°N	104.83°E	CAU	Beijing
66	Dilar spectabilis Zhang, Liu, H. Aspöck & U. Aspöck, 2014	ASI	China	Sichuan	Pingwu County, Tangjiahe, Caijiaba Natural Reserve [平武县唐家河蔡家坝自然保护区]	32.46°N	104.84°E	CAU	Beijing
66	Dilar spectabilis Zhang, Liu, H. Aspöck & U. Aspöck, 2014	ASI	China	Sichuan	Pingwu County, Mupi Township, Jinfeng Village [平武县木皮乡金丰村]	32.51°N	104.54°E	CAU	Beijing
66	Dilar spectabilis Zhang, Liu, H. Aspöck & U. Aspöck, 2014	ASI	China	Sichuan	Ganzi State, Kangding City, Yulin Street [甘孜州康定榆林街道]	29.99°N	101.94°E	CAU	Beijing
66	Dilar spectabilis Zhang, Liu, H. Aspöck & U. Aspöck, 2014	ASI	China	Sichuan	Liangshan State, Mianning County, Zhile Natural Reserve [凉山冕宁治勒省级自然保护区阔叶林]	28.92°N	102.23°E	CAU	Beijing
67	Dilar stenopterus Yang, 1999	ASI	China	Fujian	Wuyishan, Mt. Huanggangshan [武夷山黄岗山]	27.85°N	117.77°E	CAU	Beijing	Zhang et al., 2015	Dilar from Southern China
68	Dilar striatus Li, H. Aspöck, U. Aspöck & Liu, 2021	ASI	Vietnam	Ha Noi	Ba Vi Distr[ict], Mt. Ba Vi	21.06°N	105.37°E	NHMG	Geneva
69	Dilar subdolus Navás, 1932 (nomen dubium)	ASI	China	Jiangsu	Chinkiang [=Chen-chiang, =Chenkiang, =Zhenjiang]	32.05°N	119.43°E			Oswald, 1998	Catalogue of the Dilaridae
70	Dilar sumatranus Zhang, Liu, Aspöck & Aspöck in Zhang et al., 2016	ASI	Indonesia	Sumatra Utara	Utara Dairi	2.01°N	98.98°E	HUAC	Vienna	Zhang et al., 2016	Dilar from Southeast Asia
70	Dilar sumatranus Zhang, Liu, Aspöck & Aspöck in Zhang et al., 2016	ASI	Indonesia	Sumatra Utara	Pematang-Siantar	2.97°N	99.07°E	HUAC	Vienna
71	Dilar taibaishanus Zhang, Liu, H. Aspöck & U. Aspöck, 2014	ASI	China	Shaanxi	Mt. Taibaishan, Haoping Temple [宝鸡太白山嵩坪寺]	33.98°N	107.65°E	CAU	Beijing	Zhang et al., 2014a	Dilar from northern China
71	Dilar taibaishanus Zhang, Liu, H. Aspöck & U. Aspöck, 2014	ASI	China	Shaanxi	Mt. Taibaishan, Baiyun [太白山下白云]			CAU	Beijing
72	Dilar taiwanensis Banks, 1937	ASI	China	Taiwan	Formosa, Arizan (=Mt. Alishan) [阿里山]	23.52°N	120.8°E	MCZ	Cambridge	Banks, 1937	Neuropteroid insects from Formosa
72	Dilar taiwanensis Banks, 1937	ASI	China	Taiwan	[Holotype of Dilar distinctus] Nantou, Sungkang ('Tattaka') [南投松岗]	24.09°N	121.17°E	NSMT	Tokyo	Nakahara, 1955b	Dilaridae of Japan and Formosa (Neuroptera)
72	Dilar taiwanensis Banks, 1937	ASI	China	Taiwan	[Holotype of Nepal kanoi] Nantou, Sungkang ('Tattaka') [南投松岗]			NSMT	Tokyo	Nakahara, 1955a	Formosan Neuroptera collected by the late Dr. T. Kano
72	Dilar taiwanensis Banks, 1937	ASI	China	Taiwan	[Paratypes of Nepal kanoi] Nantou, Sungkang ('Tattaka') [南投松岗]			NSMT	Tokyo	Nakahara, 1955a	Formosan Neuroptera collected by the late Dr. T. Kano
72	Dilar taiwanensis Banks, 1937	ASI	China	Taiwan	Nantou County, Renai Township, Meifeng [南投仁爱乡梅峰]			CAU	Beijing
72	Dilar taiwanensis Banks, 1937	ASI	China	Taiwan	Nantou County, Renai Township, Meifeng [南投仁爱乡梅峰]			CAU	Beijing
72	Dilar taiwanensis Banks, 1937	ASI	China	Taiwan	Hualian County, Xiulin Township, Hehuanxi Creek Trail [南投县仁爱乡合欢溪步道]	24.17°N	121.22°E	CAU	Beijing
72	Dilar taiwanensis Banks, 1937	ASI	China	Taiwan	Nantou, Tayuling [南投县大禹岭]	23.92°N	120.67°E	NMNH	Washington	Zhang et al., 2014c	Dilar from islands of East Asia
72	Dilar taiwanensis Banks, 1937	ASI	China	Taiwan	Nantou, Sungkang [南投松岗]			NMNH	Washington	Zhang et al., 2014c	Dilar from islands of East Asia
72	Dilar taiwanensis Banks, 1937	ASI	China	Taiwan	Nantou County, Renai Township, Biluxi [南投仁爱乡碧禄溪]	24.24°N	121.3°E	CAU	Beijing
72	Dilar taiwanensis Banks, 1937	ASI	China	Taiwan	Nantou County, Renai Township, Yuanfeng [南投仁爱乡鸢峰]			CAU	Beijing
72	Dilar taiwanensis Banks, 1937	ASI	China	Taiwan	Nantou County, Renai Township, Hehuanxi footpath [花莲秀林合欢溪]	24.27°N	121.28°E	CAU	Beijing
72	Dilar taiwanensis Banks, 1937	ASI	China	Taiwan	Taihorin [Chiayi Country, Dalin (=Taihorin)] [嘉义县大林镇]	23.58°N	120.47°E	MFN	Berlin	Zhang et al., 2014c	Dilar from islands of East Asia
72	Dilar taiwanensis Banks, 1937	ASI	China	Taiwan	Taipei, Mt. Yangmingshan, Datun Park [台北市大屯公园]	25.15°N	121.53°E	CAU	Beijing	Zhang et al., 2014c	Dilar from islands of East Asia
72	Dilar taiwanensis Banks, 1937	ASI	China	Taiwan	Taoyuan, Mt. Tamanshan [桃园塔曼山]	24.7°N	121.45°E	CAU	Beijing	Zhang et al., 2014c	Dilar from islands of East Asia
72	Dilar taiwanensis Banks, 1937	ASI	Japan	Iriomote Island	Upper Nakara River	24.33°N	123.82°E	NSMT	Tokyo	Zhang et al., 2014c	Dilar from islands of East Asia
73	Dilar tianmuanus Yang, 2001	ASI	China	Anhui	Mt. Huangshan [Yungu] [黄山云谷]	30.02°N	118.02°E	CAU	Beijing	Zhang et al., 2015	Dilar from Southern China
73	Dilar tianmuanus Yang, 2001	ASI	China	Zhejiang	Lin-an, Mt. Tianmushan [临安天目山]	30.32°N	119.42°E	CAU	Beijing	Zhang et al., 2015	Dilar from Southern China
73	Dilar tianmuanus Yang, 2001	ASI	China	Zhejiang	Lin-an, Mt. Tianmushan [临安天目山]	30.37°N	119.43°E	CAU	Beijing	Zhang et al., 2015	Dilar from Southern China
73	Dilar tianmuanus Yang, 2001	ASI	China	Zhejiang	Lin-an, Mt. Tianmushan [临安天目山]			CAU	Beijing	Zhang et al., 2015	Dilar from Southern China
73	Dilar tianmuanus Yang, 2001	ASI	China	Zhejiang	Lin-an, Mt. Tianmushan, Qianmutian [天目山千亩田]	30.4°N	119.44°E	CAU	Beijing
73	Dilar tianmuanus Yang, 2001	ASI	China	Zhejiang	Mt. Jiulongshan, Huangtanyu [九龙山黄坛淤]	28.36°N	118.88°E	CAU	Beijing
73	Dilar tianmuanus Yang, 2001	ASI	China	Zhejiang	Mt. Longwangshan [龙王山]	30.6°N	119.81°E	CAU	Beijing
74	Dilar tibetanus Yang, 1987	ASI	China	Tibet	Bomi County [波密]	29.85°N	95.77°E	CAU	Beijing	Zhang et al., 2014b	Dilar from Tibet
74	Dilar tibetanus Yang, 1987	ASI	China	Tibet	Bomi County, Bayu Village [巴玉村]			CAU	Beijing
74	Dilar tibetanus Yang, 1987	ASI	China	Tibet	Bomi County, gangyunshanlin [岗云杉林]			CAU	Beijing
74	Dilar tibetanus Yang, 1987	ASI	China	Tibet	Bomi County, Mt. galonglashan [波密嘎龙拉山]			CAU	Beijing	Zhang et al., 2014b	Dilar from Tibet
74	Dilar tibetanus Yang, 1987	ASI	China	Tibet	Linzhi City [林芝]	30.02°N	95.97°E	CAU	Beijing	Zhang et al., 2014b	Dilar from Tibet
74	Dilar tibetanus Yang, 1987	ASI	China	Tibet	Motuo County, Beibeng Township [墨脱背崩乡]	29.24°N	95.18°E	CAU	Beijing
74	Dilar tibetanus Yang, 1987	ASI	China	Tibet	Motuo County, Lulangbin Station [墨脱县鲁郎兵站]	29.82°N	94.74°E	CAU	Beijing
74	Dilar tibetanus Yang, 1987	ASI	China	Tibet	Yigong County [易贡乡]	30.27°N	94.82°E	CAU	Beijing	Zhang et al., 2014b	Dilar from Tibet
74	Dilar tibetanus Yang, 1987	ASI	China	Tibet	Yigong County [易贡乡]			CAU	Beijing	Zhang et al., 2014b	Dilar from Tibet
74	Dilar tibetanus Yang, 1987	ASI	China	Tibet	Zhamu Town [扎木]	29.33°N	91.82°E	CAU	Beijing	Zhang et al., 2014b	Dilar from Tibet
75	Dilar truncatus Li, U. Aspöck, H. Aspöck & Liu, 2020	ASI	Sri Lanka	North Central	Anu[radhapura] Dist[rict]. Wildlife Soc. Bungalow Hunuwilagama, Wilpattu	8.41°N	80.13°E	PCWH	Farnham	Li et al., 2020	Dilar from South Asia
76	Dilar turcicus Hagen, 1858	EUR	Bosnia and Herzegovina		Domanovići near Čapljina	43.14°N	18.08°E			Pongrács, 1913	Újabb adatok Magyarország neuroptera-faunájához
76	Dilar turcicus Hagen, 1858	EUR	Bulgaria	Blagoevgrad	Belasitsa Mts., Belasitsa Chalet	41.37°N	23.13°E			Popov, 2007	Distribution of the families of Neuroptera with low species diversity in Bulgaria
76	Dilar turcicus Hagen, 1858	EUR	Bulgaria	Blagoevgrad	Kresna Gorge	41.8°N	23.17°E			Popov, 1964	What do we know on the distribution of Neuropteroidea in Bulgaria
76	Dilar turcicus Hagen, 1858	EUR	Bulgaria	Blagoevgrad	Kresna Gorge (as Kresnensko defile)			NMP	Prague	Zelený, 1971	Neuroptera, Megaloptera und Mecoptera aus Bulgarien
76	Dilar turcicus Hagen, 1858	EUR	Bulgaria	Blagoevgrad	Kresna Gorge (as Kresnensko defile)					Popov, 1993	Raphidiopteren und Neuropteren aus Bulgarien in den Sammlungen des Nationalmuseums in Prag
76	Dilar turcicus Hagen, 1858	EUR	Bulgaria	Blagoevgrad	Kresna Gorge near Kresna Town					Popov, 2001	snakeflies and the lacewing insects of the Kresna Gorge (SW Bulgaria)
76	Dilar turcicus Hagen, 1858	EUR	Bulgaria	Blagoevgrad	Kresnensdo Defile (Kresna Gorge)					Popov, 1993	Raphidiopteren und Neuropteren aus Bulgarien in den Sammlungen des Nationalmuseums in Prag
76	Dilar turcicus Hagen, 1858	EUR	Bulgaria	Blagoevgrad	Kresnensko Hanche					Popov, 2001	snakeflies and the lacewing insects of the Kresna Gorge (SW Bulgaria)
76	Dilar turcicus Hagen, 1858	EUR	Bulgaria	Blagoevgrad	Struma Valley, Kresna Gorge from Stara Kresna Railway Station to Kresna Town					Popov, 2007	Distribution of the families of Neuroptera with low species diversity in Bulgaria
76	Dilar turcicus Hagen, 1858	EUR	Bulgaria	Blagoevgrad	Peyu Yavorov Railway Station	41.75°N	23.15°E			Popov, 2001	snakeflies and the lacewing insects of the Kresna Gorge (SW Bulgaria)
76	Dilar turcicus Hagen, 1858	EUR	Bulgaria	Blagoevgrad	Pirin Mts., Popina Laka	41.67°N	23.38°E			Popov, 2007	Distribution of the families of Neuroptera with low species diversity in Bulgaria
76	Dilar turcicus Hagen, 1858	EUR	Bulgaria	Blagoevgrad	Pirin Mts., above Sugarevo near Melnik	41.56°N	24.44°E			Popov, 2007	Distribution of the families of Neuroptera with low species diversity in Bulgaria
76	Dilar turcicus Hagen, 1858	EUR	Bulgaria	Blagoevgrad	Pirin Mts., Pirin Village	41.55°N	23.56°E			Popov, 2007	Distribution of the families of Neuroptera with low species diversity in Bulgaria
76	Dilar turcicus Hagen, 1858	EUR	Bulgaria	Blagoevgrad	Pirin Mts., Kalimantsi	41.46°N	23.48°E			Popov, 2007	Distribution of the families of Neuroptera with low species diversity in Bulgaria
76	Dilar turcicus Hagen, 1858	EUR	Bulgaria	Blagoevgrad	Slavyanka Mts.	41.37°N	23.62°E			Popov, 1964	What do we know on the distribution of Neuropteroidea in Bulgaria
76	Dilar turcicus Hagen, 1858	EUR	Bulgaria	Blagoevgrad	Slavyanka Mts.					Popov, 2007	Distribution of the families of Neuroptera with low species diversity in Bulgaria
76	Dilar turcicus Hagen, 1858	EUR	Bulgaria	Blagoevgrad	Slavyanka Mts.					Popov, 2007	Distribution of the families of Neuroptera with low species diversity in Bulgaria
76	Dilar turcicus Hagen, 1858	EUR	Bulgaria	Blagoevgrad	Stara Kresna Railway Station	41.79°N	23.18°E			Popov, 2001	snakeflies and the lacewing insects of the Kresna Gorge (SW Bulgaria)
76	Dilar turcicus Hagen, 1858	EUR	Bulgaria	Blagoevgrad	Struma Valley, Kozhuh Hill near Petrich	41.45°N	23.25°E			Popov, 2007	Distribution of the families of Neuroptera with low species diversity in Bulgaria
76	Dilar turcicus Hagen, 1858	EUR	Bulgaria	Blagoevgrad	Struma Valley, Kozhuh Hill near Petrich					Popov, 2007	Distribution of the families of Neuroptera with low species diversity in Bulgaria
76	Dilar turcicus Hagen, 1858	EUR	Bulgaria	Blagoevgrad	Struma Valley, Kozhuh Hill near Petrich					Popov, 2007	Distribution of the families of Neuroptera with low species diversity in Bulgaria
76	Dilar turcicus Hagen, 1858	EUR	Bulgaria	Blagoevgrad	Struma Valley, Kozhuh Hill near Petrich					Popov, 2007	Distribution of the families of Neuroptera with low species diversity in Bulgaria
76	Dilar turcicus Hagen, 1858	EUR	Bulgaria	Blagoevgrad	Struma Valley, Kozhuh Hill near Petrich					Popov, 2007	Distribution of the families of Neuroptera with low species diversity in Bulgaria
76	Dilar turcicus Hagen, 1858	EUR	Bulgaria	Burgas	Black Sea Coast, Sozopol	42.37°N	27.72°E			Dobosz & Popov, 2018	New data about the distribution of Neuropterida in Bulgaria and Romania
76	Dilar turcicus Hagen, 1858	EUR	Bulgaria	Blagoevgrad	Struma Valley, Kozhuh Hill (Rupite), NE of Petrich					Dobosz & Popov, 2018	New data about the distribution of Neuropterida in Bulgaria and Romania
76	Dilar turcicus Hagen, 1858	EUR	Bulgaria	Blagoevgrad	Imathia, SW Georgiani Georgiani (SSW Veria)	41.92°N	23.1°E			Popov, 2007	Distribution of the families of Neuroptera with low species diversity in Bulgaria
76	Dilar turcicus Hagen, 1858	EUR	Bulgaria	Blagoevgrad	Struma Valley, Zheleznitsa near Simitli					Popov, 2007	Distribution of the families of Neuroptera with low species diversity in Bulgaria
76	Dilar turcicus Hagen, 1858	EUR	Bulgaria	Burgas	Strandja Mts., Katundere Valley near Zvezdets	42.07°N	27.45°E			Popov, 2007	Distribution of the families of Neuroptera with low species diversity in Bulgaria
76	Dilar turcicus Hagen, 1858	EUR	Bulgaria	Burgas	Strandja Mts., Kovach site near Zvezdets	42.08°N	27.43°E			Popov, 2007	Distribution of the families of Neuroptera with low species diversity in Bulgaria
76	Dilar turcicus Hagen, 1858	EUR	Bulgaria	Burgas	Strandja Mts., Krushevets	42.27°N	27.49°E			Popov, 2007	Distribution of the families of Neuroptera with low species diversity in Bulgaria
76	Dilar turcicus Hagen, 1858	EUR	Bulgaria	Burgas	Strandja Mts., Malko Tarnovo	42.02°N	27.62°E			Popov, 2007	Distribution of the families of Neuroptera with low species diversity in Bulgaria
76	Dilar turcicus Hagen, 1858	EUR	Bulgaria	Burgas	Strandja Mts., 10 km S of Yasna Polyana	42.22°N	27.59°E			Popov, 2007	Distribution of the families of Neuroptera with low species diversity in Bulgaria
76	Dilar turcicus Hagen, 1858	EUR	Bulgaria	Burgas	Strandja Mts., Zabernovska River near ist outfall in Mladezhka River	42.08°N	27.55°E			Popov, 2007	Distribution of the families of Neuroptera with low species diversity in Bulgaria
76	Dilar turcicus Hagen, 1858	EUR	Bulgaria	Haskovo	Rodopi, Markovo-Biela Cerkva	41.92°N	24.33°E	CHRR	Scheibbs	Aspöck, U. et al, 2015	The Dilaridae of the Balkan Peninsula and of Anatolia
76	Dilar turcicus Hagen, 1858	EUR	Bulgaria	Kardzhali	Eastern Rhodopes, E of Krumovgrad	41.47°N	25.67°E			Popov, 2007	Distribution of the families of Neuroptera with low species diversity in Bulgaria
76	Dilar turcicus Hagen, 1858	EUR	Bulgaria	Sliven		42.68°N	26.33°E			Popov, 1964	What do we know on the distribution of Neuropteroidea in Bulgaria
76	Dilar turcicus Hagen, 1858	EUR	Bulgaria	Sliven	Eastern Stara Planina, Sliven	42.63°N	26.17°E			Popov, 2007	Distribution of the families of Neuroptera with low species diversity in Bulgaria
76	Dilar turcicus Hagen, 1858	EUR	Bulgaria	Smolyan	Western Rhodopes, Polkovnik Serafimovo near Smolyan	41.44°N	24.83°E			Popov, 2007	Distribution of the families of Neuroptera with low species diversity in Bulgaria
76	Dilar turcicus Hagen, 1858	EUR	Bulgaria	Sofia	Central Stara Planina, Sini Vir site near Etropole	42.33°N	23.55°E			Popov, 2007	Distribution of the families of Neuroptera with low species diversity in Bulgaria
76	Dilar turcicus Hagen, 1858	EUR	Bulgaria	Sofia	Central Stara Planina, Etropole Monastery					Popov, 2007	Distribution of the families of Neuroptera with low species diversity in Bulgaria
76	Dilar turcicus Hagen, 1858	EUR	Bulgaria	Sofia	Kostenets (as Kontanec)	42.25°N	23.85°E	NMP	Prague	Zelený, 1971	Neuroptera, Megaloptera und Mecoptera aus Bulgarien
76	Dilar turcicus Hagen, 1858	EUR	Bulgaria	Sofia	Kostenets					Popov, 2007	Distribution of the families of Neuroptera with low species diversity in Bulgaria
76	Dilar turcicus Hagen, 1858	EUR	Bulgaria	Sofia	Kontanec (Kostenec bei Ihtiman)	42.3°N	23.86°E			Popov, 1993	Raphidiopteren und Neuropteren aus Bulgarien in den Sammlungen des Nationalmuseums in Prag
76	Dilar turcicus Hagen, 1858	EUR	Bulgaria	Sofia	Rila Mts.	42.18°N	23.58°E			Popov, 2007	Distribution of the families of Neuroptera with low species diversity in Bulgaria
76	Dilar turcicus Hagen, 1858	EUR	Bulgaria	Sofia	Western Stara Planina, Lakatnik in Iskar Gorge	42.97°N	23.52°E			Popov, 2007	Distribution of the families of Neuroptera with low species diversity in Bulgaria
76	Dilar turcicus Hagen, 1858	EUR	Croatia	Split-Dalmatia	Brač, Supetar	43.38°N	16.56°E			Devetak, 1992a	Megaloptera, Raphidioptera and Planipennia of Croatia
76	Dilar turcicus Hagen, 1858	EUR	Croatia	Split-Dalmatia	Brač, Nerežišca	43.33°N	16.58°E			Devetak, 1992a	Megaloptera, Raphidioptera and Planipennia of Croatia
76	Dilar turcicus Hagen, 1858	EUR	Croatia	Split-Dalmatia	Brač, Vidova gora	43.28°N	16.62°E			Devetak, 1992a	Megaloptera, Raphidioptera and Planipennia of Croatia
76	Dilar turcicus Hagen, 1858	EUR	Montenegro	Andrijevica	Tepca, Durmitor National Park	43.21°N	19.08°E			Devetak, 1991	Neuropteroidea. Megaloptera, Raphidioptera, Planipennia (Insecta)
76	Dilar turcicus Hagen, 1858	EUR	North Macedonia		S Titov Veles	41.5°N	22°E	CHRR	Scheibbs	Aspöck, U. et al, 2015	The Dilaridae of the Balkan Peninsula and of Anatolia
76	Dilar turcicus Hagen, 1858	EUR	North Macedonia		S Titov Veles			HUAC	Vienna	Aspöck, U. et al, 2015	The Dilaridae of the Balkan Peninsula and of Anatolia
76	Dilar turcicus Hagen, 1858	EUR	North Macedonia		50 km SO Titov Veles	41.58°N	21.83°E	HUAC	Vienna	Aspöck, U. et al, 2015	The Dilaridae of the Balkan Peninsula and of Anatolia
76	Dilar turcicus Hagen, 1858	EUR	North Macedonia		Stari Dojran	41.17°N	22.72°E	HUAC	Vienna	Aspöck, U. et al, 2015	The Dilaridae of the Balkan Peninsula and of Anatolia
76	Dilar turcicus Hagen, 1858	EUR	North Macedonia		Jakupica, Urnat Kamen	41.83°N	21.23°E			Devetak et al., 2015	Fauna of the Neuropterida (Raphidioptera, Neuroptera) of the Protected Area Jasen, Macedonia: a summer flash
76	Dilar turcicus Hagen, 1858	EUR	North Macedonia		Matka, Canyon of the Treska River	41.92°N	21.28°E			Devetak et al., 2015	Fauna of the Neuropterida (Raphidioptera, Neuroptera) of the Protected Area Jasen, Macedonia: a summer flash
76	Dilar turcicus Hagen, 1858	EUR	North Macedonia		Matka, Treska Schlucht	41.98°N	21.38°E	HUAC	Vienna	Aspöck, U. et al, 2015	The Dilaridae of the Balkan Peninsula and of Anatolia
76	Dilar turcicus Hagen, 1858	EUR	North Macedonia		Rudine, Plateau	41.88°N	21.22°E			Devetak et al., 2015	Fauna of the Neuropterida (Raphidioptera, Neuroptera) of the Protected Area Jasen, Macedonia: a summer flash
76	Dilar turcicus Hagen, 1858	EUR	Greece	Central Greece	Attika, Pendelikin (N, E und S-Hänge)	38.07°N	23.92°E	CHRR	Scheibbs	Aspöck, U. et al, 2015	The Dilaridae of the Balkan Peninsula and of Anatolia
76	Dilar turcicus Hagen, 1858	EUR	Greece	Central Greece	Evrytania, N Domnista (Bachtal)	38.75°N	21.85°E	CHRR	Scheibbs	Aspöck, U. et al, 2015	The Dilaridae of the Balkan Peninsula and of Anatolia
76	Dilar turcicus Hagen, 1858	EUR	Greece	Central Greece	Pthiotis, Pindos, Timfristos-N-Hang, 2 km E Agios Triada	38.97°N	21.83°E	CHRR	Scheibbs	Aspöck, U. et al, 2015	The Dilaridae of the Balkan Peninsula and of Anatolia
76	Dilar turcicus Hagen, 1858	EUR	Greece	Central Macedonia	Chalkididi, Amea-Polygiros	40.45°N	23.52°E	CHRR	Scheibbs	Aspöck, U. et al, 2015	The Dilaridae of the Balkan Peninsula and of Anatolia
76	Dilar turcicus Hagen, 1858	EUR	Greece	Central Macedonia	Chalkidiki, E und SW Arnaia	40.5°N	23.6°E	HUAC	Vienna	Aspöck, U. et al, 2015	The Dilaridae of the Balkan Peninsula and of Anatolia
76	Dilar turcicus Hagen, 1858	EUR	Greece	Central Macedonia	Imathia, SW Georgiani Georgiani (SSW Veria)	40.47°N	22.15°E	CHRR	Scheibbs	Aspöck, U. et al, 2015	The Dilaridae of the Balkan Peninsula and of Anatolia
76	Dilar turcicus Hagen, 1858	EUR	Greece	Central Macedonia	Kastoria, W Zouzouli	40.2°N	21.02°E	CHRR	Scheibbs	Aspöck, U. et al, 2015	The Dilaridae of the Balkan Peninsula and of Anatolia
76	Dilar turcicus Hagen, 1858	EUR	Greece	Central Macedonia	Kozani, W Pendalofon	40.23°N	21.15°E	CHRR	Scheibbs	Aspöck, U. et al, 2015	The Dilaridae of the Balkan Peninsula and of Anatolia
76	Dilar turcicus Hagen, 1858	EUR	Greece	Central Macedonia	Olymp, Karia	39.99°N	22.39°E	HUAC	Vienna	Aspöck, U. et al, 2015	The Dilaridae of the Balkan Peninsula and of Anatolia
76	Dilar turcicus Hagen, 1858	EUR	Greece	Central Macedonia	Olymp, Karia			HUAC	Vienna	Aspöck, U. et al, 2015	The Dilaridae of the Balkan Peninsula and of Anatolia
76	Dilar turcicus Hagen, 1858	EUR	Greece	Central Macedonia	Olymp, Kataphygion	38.08°N	22.42°E	HUAC	Vienna	Aspöck, U. et al, 2015	The Dilaridae of the Balkan Peninsula and of Anatolia
76	Dilar turcicus Hagen, 1858	EUR	Greece	Central Macedonia	Olymp, Kloster Agios Dionysios	37.77°N	20.9°E	HUAC	Vienna	Aspöck, U. et al, 2015	The Dilaridae of the Balkan Peninsula and of Anatolia				1957
76	Dilar turcicus Hagen, 1858	EUR	Greece	Central Macedonia	Olymp, Schutzhaus	40.1°N	22.5°E	CHRR	Scheibbs	Aspöck, U. et al, 2015	The Dilaridae of the Balkan Peninsula and of Anatolia
76	Dilar turcicus Hagen, 1858	EUR	Greece	East Macedonia and Thrace	Kavala, Karia			HUAC	Vienna	Aspöck, U. et al, 2015	The Dilaridae of the Balkan Peninsula and of Anatolia
76	Dilar turcicus Hagen, 1858	EUR	Greece	Central Macedonia	Piera, Olympos	40.08°N	22.38°E	CHRR	Scheibbs	Aspöck, U. et al, 2015	The Dilaridae of the Balkan Peninsula and of Anatolia
76	Dilar turcicus Hagen, 1858	EUR	Greece	East Macedonia and Thrace	Alexandroupolis	40.88°N	25.84°E	HUAC	Vienna	Aspöck, U. et al, 2015	The Dilaridae of the Balkan Peninsula and of Anatolia
76	Dilar turcicus Hagen, 1858	EUR	Greece	East Macedonia and Thrace	Prov. Evros	41.17°N	26.08°E			Popov, 2004	List of Raphidioptera, Neuroptera and Mecoptera published from the Eastern Rhodopes (Bulgaria and Greece)
76	Dilar turcicus Hagen, 1858	EUR	Greece	East Macedonia and Thrace	Insel Samothraki, bei Kirche Kremniotissa	40.42°N	25.57°E	CHRR	Scheibbs	Aspöck, U. et al, 2015	The Dilaridae of the Balkan Peninsula and of Anatolia
76	Dilar turcicus Hagen, 1858	EUR	Greece	East Macedonia and Thrace	Thasos, Ipsarion	40.73°N	24.65°E	HUAC	Vienna	Aspöck, U. et al, 2015	The Dilaridae of the Balkan Peninsula and of Anatolia
76	Dilar turcicus Hagen, 1858	EUR	Greece	East Macedonia and Thrace	Thasos, Panagia	40.73°N	24.73°E	HUAC	Vienna	Aspöck, U. et al, 2015	The Dilaridae of the Balkan Peninsula and of Anatolia
76	Dilar turcicus Hagen, 1858	EUR	Greece	East Macedonia and Thrace	Thasos, 2 km NE von Marie´	40.7°N	24.65°E	CHRR	Scheibbs	Aspöck, U. et al, 2015	The Dilaridae of the Balkan Peninsula and of Anatolia
76	Dilar turcicus Hagen, 1858	EUR	Greece	East Macedonia and Thrace	Thrakien, Berg Heptadendros (W-Hang)	41.03°N	25.82°E	CHRR	Scheibbs	Aspöck, U. et al, 2015	The Dilaridae of the Balkan Peninsula and of Anatolia
76	Dilar turcicus Hagen, 1858	EUR	Greece	East Macedonia and Thrace	Thrakien, Kapsalo	41.08°N	26.08°E	HUAC	Vienna	Aspöck, U. et al, 2015	The Dilaridae of the Balkan Peninsula and of Anatolia
76	Dilar turcicus Hagen, 1858	EUR	Greece	Epirus	Ioannina, NE Metsovo Umg.Katara-Paß	39.8°N	21.23°E	CHRR	Scheibbs	Aspöck, U. et al, 2015	The Dilaridae of the Balkan Peninsula and of Anatolia
76	Dilar turcicus Hagen, 1858	EUR	Greece	Epirus	Ioannina, SSW Vitsa	39.85°N	20.77°E	CHRR	Scheibbs	Aspöck, U. et al, 2015	The Dilaridae of the Balkan Peninsula and of Anatolia
76	Dilar turcicus Hagen, 1858	EUR	Greece	Epirus	Ionnina, Mitsikeli-Gebirge, SE Elati			CHRR	Scheibbs	Aspöck, U. et al, 2015	The Dilaridae of the Balkan Peninsula and of Anatolia
76	Dilar turcicus Hagen, 1858	EUR	Greece	Epirus	Ionnina, Mitsikeli-Gebirge, SE Elati			CHRR	Scheibbs	Aspöck, U. et al, 2015	The Dilaridae of the Balkan Peninsula and of Anatolia
76	Dilar turcicus Hagen, 1858	EUR	Greece	Epirus	Smolikas, Furka	40.15°N	20.93°E	CHRR	Scheibbs	Aspöck, U. et al, 2015	The Dilaridae of the Balkan Peninsula and of Anatolia
76	Dilar turcicus Hagen, 1858	EUR	Greece	Ionian Islands	Korfu	39.6°N	19.83°E			Oswald, 1998	Catalogue of the Dilaridae
76	Dilar turcicus Hagen, 1858	EUR	Greece	Ionian Islands	Corfu (island)	39.58°N	19.87°E	NHMW	Vienna	Aspöck, U. et al, 2015	The Dilaridae of the Balkan Peninsula and of Anatolia
76	Dilar turcicus Hagen, 1858	EUR	Greece	Ionian Islands	Makri	38.37°N	21.03°E	HUAC	Vienna	Aspöck, U. et al, 2015	The Dilaridae of the Balkan Peninsula and of Anatolia
76	Dilar turcicus Hagen, 1858	EUR	Greece	North Aegean	Chios, 5 km NÖ Piramá	38.53°N	29.9°E	CHRR	Scheibbs	Aspöck, U. et al, 2015	The Dilaridae of the Balkan Peninsula and of Anatolia
76	Dilar turcicus Hagen, 1858	EUR	Greece	North Aegean	Chios, N Keramos	38.57°N	25.93°E	CHRR	Scheibbs	Aspöck, U. et al, 2015	The Dilaridae of the Balkan Peninsula and of Anatolia
76	Dilar turcicus Hagen, 1858	EUR	Greece	North Aegean	Ikaria, Milopo-Monokampion	37.65°N	26.33°E	HUAC	Vienna	Aspöck, U. et al, 2015	The Dilaridae of the Balkan Peninsula and of Anatolia
76	Dilar turcicus Hagen, 1858	EUR	Greece	North Aegean	Ikaria, Chrisostomos	37.58°N	26.22°E	HUAC	Vienna	Aspöck, U. et al, 2015	The Dilaridae of the Balkan Peninsula and of Anatolia
76	Dilar turcicus Hagen, 1858	EUR	Greece	North Aegean	Lesbos, Olympos-Gebirge, SE Agiasos	39.06°N	26.39°E	CHRR	Scheibbs	Aspöck, U. et al, 2015	The Dilaridae of the Balkan Peninsula and of Anatolia
76	Dilar turcicus Hagen, 1858	EUR	Greece	North Aegean	Lesbos, Olympos-Gebirge, SW Agiasos	39.07°N	26.35°E	CHRR	Scheibbs	Aspöck, U. et al, 2015	The Dilaridae of the Balkan Peninsula and of Anatolia
76	Dilar turcicus Hagen, 1858	EUR	Greece	North Aegean	Lesbos, Olympos-Gebirge, SW Agiasos			CHRR	Scheibbs	Aspöck, U. et al, 2015	The Dilaridae of the Balkan Peninsula and of Anatolia
76	Dilar turcicus Hagen, 1858	EUR	Greece	North Aegean	Lesbos, Olympos-Gebirge, SW Agiasos			CHRR	Scheibbs	Aspöck, U. et al, 2015	The Dilaridae of the Balkan Peninsula and of Anatolia
76	Dilar turcicus Hagen, 1858	EUR	Greece	North Aegean	Lesbos, Olympos-Gebirge, SW Agiasos			CHRR	Scheibbs	Aspöck, U. et al, 2015	The Dilaridae of the Balkan Peninsula and of Anatolia
76	Dilar turcicus Hagen, 1858	EUR	Greece	North Aegean	Lesbos, Olympos-Gebirge, SW Agiasos			CHRR	Scheibbs	Aspöck, U. et al, 2015	The Dilaridae of the Balkan Peninsula and of Anatolia
76	Dilar turcicus Hagen, 1858	EUR	Greece	North Aegean	Lesbos, 7 km E Plomari	38.98°N	26.43°E	CHRR	Scheibbs	Aspöck, U. et al, 2015	The Dilaridae of the Balkan Peninsula and of Anatolia
76	Dilar turcicus Hagen, 1858	EUR	Greece	North Aegean	Samos, Mytilini-Pirgos	37.75°N	26.83°E	HUAC	Vienna	Aspöck, U. et al, 2015	The Dilaridae of the Balkan Peninsula and of Anatolia
76	Dilar turcicus Hagen, 1858	EUR	Greece	Peloponnese	Achia, Mega Spileon	38.08°N	22.17°E	HUAC	Vienna	Aspöck, U. et al, 2015	The Dilaridae of the Balkan Peninsula and of Anatolia
76	Dilar turcicus Hagen, 1858	EUR	Greece	Peloponnese	Arkadien, Parnon-Gebirge, Gaitanorachi	37.23°N	22.63°E	CHRR	Scheibbs	Aspöck, U. et al, 2015	The Dilaridae of the Balkan Peninsula and of Anatolia
76	Dilar turcicus Hagen, 1858	EUR	Greece	Peloponnese	Lakonien, WNW Richia	36.86°N	22.98°E	CHRR	Scheibbs	Aspöck, U. et al, 2015	The Dilaridae of the Balkan Peninsula and of Anatolia
76	Dilar turcicus Hagen, 1858	EUR	Greece	Peloponnese	Lakonien, Parnon-Gebirge, Berg Kanelia	37.26°N	22.6°E	CHRR	Scheibbs	Aspöck, U. et al, 2015	The Dilaridae of the Balkan Peninsula and of Anatolia
76	Dilar turcicus Hagen, 1858	EUR	Greece	Peloponnese	Mte. Killini, Vetta	37.94°N	22.4°E	MG	Genova	Monserrat, 2005	Nuevos datos sobre algunas pequeñas familias de neurópteros
76	Dilar turcicus Hagen, 1858	EUR	Greece	Peloponnese	Peloponnes, Lakonien, Hochtal E Kremasti	36.97°N	22.92°E	CHRR	Scheibbs	Aspöck, U. et al, 2015	The Dilaridae of the Balkan Peninsula and of Anatolia
76	Dilar turcicus Hagen, 1858	EUR	Greece	Peloponnese	Parnon	37.1°N	22.72°E	CHRR	Scheibbs	Aspöck, U. et al, 2015	The Dilaridae of the Balkan Peninsula and of Anatolia
76	Dilar turcicus Hagen, 1858	EUR	Greece	Peloponnese	Taygetos	37.12°N	22.27°E	CHRR	Scheibbs	Aspöck, U. et al, 2015	The Dilaridae of the Balkan Peninsula and of Anatolia
76	Dilar turcicus Hagen, 1858	EUR	Greece	Thessaly	Insel Skopelos, Ag. Trifonas	39.1°N	23.7°E	CHRR	Scheibbs	Aspöck, U. et al, 2015	The Dilaridae of the Balkan Peninsula and of Anatolia
76	Dilar turcicus Hagen, 1858	EUR	Greece	Thessaly	Thessalia, Larisa, Kariá	40°N	22.43°E	CHRR	Scheibbs	Aspöck, U. et al, 2015	The Dilaridae of the Balkan Peninsula and of Anatolia
76	Dilar turcicus Hagen, 1858	EUR	Greece	Thessaly	Thessalia, Larissa, Ossa-Gebirge, W Karitsa	39.85°N	22.75°E	CHRR	Scheibbs	Aspöck, U. et al, 2015	The Dilaridae of the Balkan Peninsula and of Anatolia
76	Dilar turcicus Hagen, 1858	ASI	Russia	Krasnodar Krai		45.63°N	39.7°E			Zakharenko & Krivokhatsky, 1993	Neuroptera from the European Part of the Former USSR
76	Dilar turcicus Hagen, 1858	ASI	Russia	Krasnodar Krai	Chelbas Forestry	45.65°N	39.9°E			Ghilarov, 1962	The Larva of Dilar turcicus and the position of the Family Dilaridae in the Order Planipennia
76	Dilar turcicus Hagen, 1858	ASI	Russia	Krasnodar Krai	Mt. range Markotkh, between Novorossiysk and Gelendzhik	44.65°N	37.97°E			Ghilarov, 1962	The Larva of Dilar turcicus and the position of the Family Dilaridae in the Order Planipennia
76	Dilar turcicus Hagen, 1858	EUR	Turkey	Aydin	Str. Nazilli-Beydağ	38.02°N	28.3°E	HUAC	Vienna	Aspöck, U. et al, 2015	The Dilaridae of the Balkan Peninsula and of Anatolia
76	Dilar turcicus Hagen, 1858	EUR	Turkey	Aydin	Str. Nazilli-Beydağ			HUAC	Vienna	Aspöck, U. et al, 2015	The Dilaridae of the Balkan Peninsula and of Anatolia
76	Dilar turcicus Hagen, 1858	EUR	Turkey	Burdur	S Celtikçi Geçidi	37.55°N	30.47°E	HUAC	Vienna	Aspöck, U. et al, 2015	The Dilaridae of the Balkan Peninsula and of Anatolia
76	Dilar turcicus Hagen, 1858	EUR	Turkey	Burdur	S Celtikçi Geçidi			CHRR	Scheibbs	Aspöck, U. et al, 2015	The Dilaridae of the Balkan Peninsula and of Anatolia
76	Dilar turcicus Hagen, 1858	EUR	Turkey	Çanakkale	Vil. Canakkale, Kaz Dağ, S Evciler, SE Bayramiç	39.76°N	26.87°E	CHRR	Scheibbs	Aspöck, U. et al, 2015	The Dilaridae of the Balkan Peninsula and of Anatolia
76	Dilar turcicus Hagen, 1858	EUR	Turkey	Denizli	Bozkurt, Inceler + 25 km Cam Ormanz	37.7°N	29.57°E	NHMW	Vienna	Aspöck, U. et al, 2015	The Dilaridae of the Balkan Peninsula and of Anatolia
76	Dilar turcicus Hagen, 1858	EUR	Turkey	Denizli	W Paşçeşme (W Bozkurt)	37.83°N	29.53°E	HUAC	Vienna	Aspöck, U. et al, 2015	The Dilaridae of the Balkan Peninsula and of Anatolia
76	Dilar turcicus Hagen, 1858	EUR	Turkey	Denizli	Koca Yayla, W Inceler	37.75°N	29.6°E	HUAC	Vienna	Aspöck, U. et al, 2015	The Dilaridae of the Balkan Peninsula and of Anatolia
76	Dilar turcicus Hagen, 1858	EUR	Turkey	Izmir	10 km N Selçuk	37.62°N	27.37°E	HUAC	Vienna	Aspöck, U. et al, 2015	The Dilaridae of the Balkan Peninsula and of Anatolia
76	Dilar turcicus Hagen, 1858	EUR	Turkey	Izmir	Bergama, Schluchtbach	39.17°N	27.17°E	CHRR	Scheibbs	Aspöck, U. et al, 2015	The Dilaridae of the Balkan Peninsula and of Anatolia
76	Dilar turcicus Hagen, 1858	EUR	Turkey	Izmir	N Birgi (Ödemis)	38.25°N	28.05°E	CHRR	Scheibbs	Aspöck, U. et al, 2015	The Dilaridae of the Balkan Peninsula and of Anatolia
76	Dilar turcicus Hagen, 1858	EUR	Turkey	Izmir	N Bozdağ, NE Ödemiş	38.37°N	27.97°E	CHRR	Scheibbs	Aspöck, U. et al, 2015	The Dilaridae of the Balkan Peninsula and of Anatolia
76	Dilar turcicus Hagen, 1858	EUR	Turkey	Izmir	Izmir	38.41°N	27.13°E	NHMW	Vienna	Aspöck, U. et al, 2015	The Dilaridae of the Balkan Peninsula and of Anatolia
76	Dilar turcicus Hagen, 1858	EUR	Turkey	Izmir	Izmir			MFN	Berlin	Aspöck, U. et al, 2015	The Dilaridae of the Balkan Peninsula and of Anatolia
76	Dilar turcicus Hagen, 1858	EUR	Turkey	Izmir	Vil. Izmir, Boz Dağ, NW Bozdağ	38.39°N	28.08°E	CHRR	Scheibbs	Aspöck, U. et al, 2015	The Dilaridae of the Balkan Peninsula and of Anatolia
76	Dilar turcicus Hagen, 1858	EUR	Turkey	Manisa	Kuroköy,\ Yköseler (großer Bach)	38.83°N	27.23°E	CHRR	Scheibbs	Aspöck, U. et al, 2015	The Dilaridae of the Balkan Peninsula and of Anatolia
76	Dilar turcicus Hagen, 1858	EUR	Turkey	Mersin	20 km W von Silifke	36.36°N	33.41°E	CHRR	Scheibbs	Aspöck, U. et al, 2015	The Dilaridae of the Balkan Peninsula and of Anatolia
76	Dilar turcicus Hagen, 1858	EUR	Turkey	Mersin	Silifke/Gülnar, 20 km W von Silifke			NHMW	Vienna	Aspöck, U. et al, 2015	The Dilaridae of the Balkan Peninsula and of Anatolia
76	Dilar turcicus Hagen, 1858	EUR	Turkey	Mugla	S Cetibeli-Paß, am Bach Cetibeli	36.9°N	28.3°E	CHRR	Scheibbs	Aspöck, U. et al, 2015	The Dilaridae of the Balkan Peninsula and of Anatolia
76	Dilar turcicus Hagen, 1858	EUR	Ukraine	Crimea	Alushta, Southern of Crimea	37.94°N	22.4°E	MNHN	Paris	Monserrat, 2005	Nuevos datos sobre algunas pequeñas familias de neurópteros
76	Dilar turcicus Hagen, 1858	EUR	Ukraine	Crimea	Alushta			NHMG	Geneve	Aspöck, U. et al, 2015	The Dilaridae of the Balkan Peninsula and of Anatolia
76	Dilar turcicus Hagen, 1858	EUR	Ukraine	Crimea	Alushta					Zakharenko, 1988	Neuroptera of the fauna of the USSR. II. Fam. Dilaridae, Berothidae and Sisyridae
76	Dilar turcicus Hagen, 1858	EUR	Ukraine	Crimea	Krim	44.92°N	34.1°E			Zakharenko & Krivokhatsky, 1993	Neuroptera from the European Part of the Former USSR
77	Dilar vartianorum H. Aspöck & U. Aspöck, 1967	ASI	Afghanistan	Nuristan	25 km nordl. von Barikot	33.3°N	71.6°E	HUAC	Vienna	Aspöck, H. & Aspöck, U., 1967	Neue Dilariden aus Asien (Neuroptera, Planipennia)
77	Dilar vartianorum H. Aspöck & U. Aspöck, 1967	ASI	Afghanistan	Nangarhar	Safed Koh Mountains, Südseite Kotkai [Nangarhar Province, Safed Koh Mountain]	33.99°N	70.37°E	HUAC	Vienna	Li et al., 2019	Dilar from the Central Asia
77	Dilar vartianorum H. Aspöck & U. Aspöck, 1967	ASI	India	Jammu and Kashmir	Tangmarg-Gulmarg [Baramulla District, Tangmarg and Gulmarg]	34.03°N	74.25°E	CHRR	Scheibbs	Li et al., 2019	Dilar from the Central Asia
77	Dilar vartianorum H. Aspöck & U. Aspöck, 1967	ASI	India	Jammu and Kashmir	Tangmarg-Gulmarg [Baramulla District, Tangmarg and Gulmarg]			HUAC	Vienna	Li et al., 2019	Dilar from the Central Asia
77	Dilar vartianorum H. Aspöck & U. Aspöck, 1967	ASI	India	Jammu and Kashmir	Gulmarg Town	34.05°N	74.38°E	BNHM	London	Li et al., 2019	Dilar from the Central Asia
77	Dilar vartianorum H. Aspöck & U. Aspöck, 1967	ASI	India	Jammu and Kashmir	Waniaram bei, Kangan [Ganderbal District, Kangan Town]	34.3°N	75.22°E	CHRR	Scheibbs	Li et al., 2019	Dilar from the Central Asia
77	Dilar vartianorum H. Aspöck & U. Aspöck, 1967	ASI	India	Jammu and Kashmir	Kishtwar (Jammu) Palmar-Sonder-Yourdu	33.3°N	75.3°E	HUAC	Vienna	Li et al., 2019	Dilar from the Central Asia
77	Dilar vartianorum H. Aspöck & U. Aspöck, 1967	ASI	India	Jammu and Kashmir	Kishtwar (Jammu), Yourdu-Sarkandu-Inshan			HUAC	Vienna	Li et al., 2019	Dilar from the Central Asia
77	Dilar vartianorum H. Aspöck & U. Aspöck, 1967	ASI	India	Jammu and Kashmir	SE Anantnag, Lahinwan-Margan Paβ [Anantnag District, Margan Mountain]			CHRR	Scheibbs	Li et al., 2019	Dilar from the Central Asia
77	Dilar vartianorum H. Aspöck & U. Aspöck, 1967	ASI	India	Jammu and Kashmir	SE Anantnag, Lahinwan-Margan Paβ [Anantnag District, Margan Mountain]			HUAC	Vienna	Li et al., 2019	Dilar from the Central Asia
77	Dilar vartianorum H. Aspöck & U. Aspöck, 1967	ASI	India	Jammu and Kashmir	Cachemira, Rampur	34.41°N	74.47°E	BNHM	London	Monserrat, 1989	Algunos Neuroperos de Museo de Basilea
77	Dilar vartianorum H. Aspöck & U. Aspöck, 1967	ASI	Pakistan	Khyber Pakhtunkhwa	Prov. Swat Kalam [Swat District, Kalam Valley]	35.52°N	72.59°E	HUAC	Vienna	Li et al., 2019	Dilar from the Central Asia
77	Dilar vartianorum H. Aspöck & U. Aspöck, 1967	ASI	Pakistan	Khyber Pakhtunkhwa	North-West Frontier: 'Salf-ui-Maluk Sar'	34.64°N	71.94°E	NHMB	Basel	Monserrat, 1989	Algunos Neuroperos de Museo de Basilea
77	Dilar vartianorum H. Aspöck & U. Aspöck, 1967	ASI	Pakistan	Khyber Pakhtunkhwa	Kaghan	34.55°N	73.35°E	BNHM	London	Monserrat, 1989	Algunos Neuroperos de Museo de Basilea
77	Dilar vartianorum H. Aspöck & U. Aspöck, 1967	ASI	Pakistan	Khyber Pakhtunkhwa	Lulu Sar	35°N	73.15°E	BNHM	London	Monserrat, 1989	Algunos Neuroperos de Museo de Basilea
77	Dilar vartianorum H. Aspöck & U. Aspöck, 1967	ASI	Uzbekistan	Jizzakh	Vil. Dzhizak, Turkestanisches, Geb., Douba [Jizzakh District]	39.73°N	68.42°E	CHRR	Scheibbs	Li et al., 2019	Dilar from the Central Asia
78	Dilar vietnamensis Zakharenko, 1991	ASI	Vietnam	Binh Thuan	Onang Ninh, Dongkho' [=Dong Kho]	11.12°N	107.77°E	ZMUM	Moscow	Oswald, 1998	Catalogue of the Dilaridae
79	Dilar wuyianus Yang, 1999	ASI	China	Fujian	Nanping, Mt. Wuyishan, Dazhulan [武夷山大竹岚]	27.68°N	117.63°E	CAU	Beijing	Zhang et al., 2015	Dilar from Southern China
79	Dilar wuyianus Yang, 1999	ASI	China	Fujian	Nanping, Mt. Wuyishan, Sangang, Miaowan [南平市武夷山三港庙湾]	27.73°N	117.62°E	CAU	Beijing	Zhang et al., 2015	Dilar from Southern China
79	Dilar wuyianus Yang, 1999	ASI	China	Fujian	Nanping, Mt. Wuyishan, Sangang, Guadun [南平市武夷山三港挂墩]			CAU	Beijing	Zhang et al., 2015	Dilar from Southern China
79	Dilar wuyianus Yang, 1999	ASI	China	Fujian	Nanping, Mt. Wuyishan, Sangang, Xianfengling [南平市武夷山三港先锋岭]			CAU	Beijing	Zhang et al., 2015	Dilar from Southern China
80	Dilar weibaoshanensis Li, H. Aspöck, U. Aspöck & Liu, 2021	ASI	China	Yunnan	Pingbian, Weicheng Umgeb, Mt. Weibaoshan [屏边巍宝山]	25.07°N	100.33°E	CHRR	Scheibbs
80	Dilar weibaoshanensis Li, H. Aspöck, U. Aspöck & Liu, 2021	ASI	China	Yunnan	Pingbian, Weicheng Umgeb, Mt. Weibaoshan [屏边巍宝山]			NHMW	Vienna
81	Dilar yangi Zhang, Liu, H. Aspöck & U. Aspöck, 2015	ASI	China	Guangxi	Wuming, Mt. Damingshan [武鸣大明山]	23.4°N	108.47°E	CAU	Beijing	Zhang et al., 2015	Dilar from Southern China
82	Dilar yucheni Li, H. Aspöck, U. Aspöck & Liu, 2021	ASI	China	Tibet	Zayü County, Xia Zayü [下察隅县]	28.5°N	97.02°E	CAU	Beijing
83	Dilar yunnanus Yang, 1986	ASI	China	Yunnan	Ruili [Mengxiu] [瑞丽勐秀]	24.07°N	97.78°E	CAU	Beijing	Zhang et al., 2015	Dilar from Southern China
83	Dilar yunnanus Yang, 1986	ASI	China	Yunnan	Lincang, Gengma [临沧耿马]	23.53°N	99.4°E	IZCAS	Beijing	Zhang et al., 2015	Dilar from Southern China
84	Dilar zhangweiae Li, H. Aspöck, U. Aspöck & Liu, 2021	ASI	China	Tibet	Zayü County, near city [察隅县城附近]	29.1°N	97.78°E	CAU	Beijing
84	Dilar zhangweiae Li, H. Aspöck, U. Aspöck & Liu, 2021	ASI	China	Tibet	Zayü County, Xia Zayü, Zayü Farm Laochangbu [察隅农场老场部]	28.68°N	97.46°E	CAU	Beijing
84	Dilar zhangweiae Li, H. Aspöck, U. Aspöck & Liu, 2021	ASI	China	Tibet	Zayü County, Xia Zayü, Gadui Village [下察隅嘎堆村]	28.5°N	97.02°E	CAU	Beijing
85	Dilar zimmermannae Zhang, Liu, Aspöck & Aspöck in Zhang et al., 2016	ASI	Myanmar	Chin	Natmataung Nat. Park, WNW Kanpetlet township	21.21°N	94.02°E	NHMW	Vienna	Zhang et al., 2016	Dilar from Southeast Asia
85	Dilar zimmermannae Zhang, Liu, Aspöck & Aspöck in Zhang et al., 2016	ASI	Myanmar	Chin	Natmataung Nat. Park, WNW Kanpetlet township	21.22°N	93.98°E	NHMW	Vienna	Zhang et al., 2016	Dilar from Southeast Asia
86	Dilar sp. 1	ASI	Russia	Dagestan	Gunib	42.38°N	46.97°E			Aspöck, U. et al, 2015	The Dilaridae of the Balkan Peninsula and of Anatolia
86	Dilar sp. 1	ASI	Turkey	Kırklareli	Istranca Dağları	41.84°N	27.3°E	CHRR	Scheibbs	Aspöck, U. et al, 2015	The Dilaridae of the Balkan Peninsula and of Anatolia
86	Dilar sp. 1	ASI	Turkey	Bursa	Kestel, Şevketiye, 2 km N	40.14°N	29.34°E			Aspöck, U. et al, 2015	The Dilaridae of the Balkan Peninsula and of Anatolia
86	Dilar sp. 1	ASI	Turkey	Bursa	Kestel, Alaçam, 1 km N	40.13°N	29.29°E			Aspöck, U. et al, 2015	The Dilaridae of the Balkan Peninsula and of Anatolia
86	Dilar sp. 1	ASI	Turkey	Bursa	Osmangazi, Soğukpınar-Ketenlik Plateau	40.06°N	29.12°E			Aspöck, U. et al, 2015	The Dilaridae of the Balkan Peninsula and of Anatolia
86	Dilar sp. 1	ASI	Turkey	Antalya	Alanya (road Taşkent-Alanya, 7 km to Alanya)	36.72°N	32.47°E			Aspöck, U. et al, 2015	The Dilaridae of the Balkan Peninsula and of Anatolia
86	Dilar sp. 1	ASI	Turkey	Antalya	Kaş (Gömbe, Sinekçibeli M. P.)	36.45°N	29.65°E			Aspöck, U. et al, 2015	The Dilaridae of the Balkan Peninsula and of Anatolia
86	Dilar sp. 1	ASI	Turkey	Antalya	Kaş (Gömbe, Sinekçibeli M. P., Sinekçi)					Aspöck, U. et al, 2015	The Dilaridae of the Balkan Peninsula and of Anatolia
87	Dilar sp. 2	ASI	China	Shanxi	Mt. Lishan, Huangguman [历山皇姑幔]	35.27°N	111.89°E	CAU	Beijing
87	Dilar sp. 2	ASI	China	Shandong	Qingdao, Mt. Laoshan, Beijiushui [青岛崂山北九水]	36.22°N	120.6°E	CAU	Beijing
88	Dilar sp. 3	ASI	China	Hunan	Zhangjiajie [张家界]	29.13°N	110.49°E	CAU	Beijing

## Sheet: Neonallachius
Supplementary material 1. Distribution data of species of Neonallachius
	current name	continent	country	province / state / prefecture	location	coordinate		collection		citation	titel (short version)
1	Neonallachius annandalei Nakahara, 1963	ASI	India	Odisha	Barkuda Id., Chilka Lake, Ganjam district, Madras	19.47°N	85.08°E	NZSI	Calcutta	Oswald, 1998	Annotated Catalogue of the Dilaridae
2	Neonallachius krooni (Minter, 1986)	AFR	South Africa	Transvaal	Wylliespoort	22.92°N	29.93°E	NCIP	Pretoria	Minter, 1986	The first record of Dilaridae from AFR
2	Neonallachius krooni (Minter, 1986)	AFR	South Africa	Transvaal	Kruger National Park, Renoster Koppie	29.07°S	31.35°E	KNPC	Skukuza	Minter, 1986	The first record of Dilaridae from AFR
2	Neonallachius krooni (Minter, 1986)	AFR	South Africa	Transvaal	Pafuri	21.99°S	31.31°E			Minter, 1986	The first record of Dilaridae from AFR
2	Neonallachius krooni (Minter, 1986)	AFR	South Africa	Transvaal	Kruger National Park, Shingwedzi	23.11°S	31.44°E	VM	Madrid	Monserrat, 2005	Nuevos datos sobre algunas pequeñas familias de neurópteros
2	Neonallachius krooni (Minter, 1986)	AFR	Malawi	Maiwale	Maiwalee [= Mangochi]	14.49°S	35.25°E	BNHM	London	Minter, 1986	The first record of Dilaridae from AFR
2	Neonallachius krooni (Minter, 1986)	AFR	Namibia	Tiervallei	10 km N Kombat on road to Grootfontein	19.40°S	17.40°E			Minter, 1986	The first record of Dilaridae from AFR
2	Neonallachius krooni (Minter, 1986)	AFR	Namibia	Khomas	Windhut (Windhoek)	22.57°S	17.07°E	MFN	Berlin	Monserrat, 2005	Nuevos datos sobre algunas pequeñas familias de neurópteros
2	Neonallachius krooni (Minter, 1986)	AFR	Kenya	Kilifi	Arabuko Sokoke Forest	3.32°S	39.95°E	HUAC	Vienna
2	Neonallachius krooni (Minter, 1986)	AFR	Kenya	Kilifi	Arabuko Sokoke Forest			NHMW	Vienna
2	Neonallachius krooni (Minter, 1986)	AFR	Kenya	Kilifi	Arabuko Sokoke Forest			AGC	Freising
2	Neonallachius krooni (Minter, 1986)	AFR	Kenya	Kilifi	Arabuko Sokoke Forest			CAU	Beijing
3	Neonallachius orientalis Liu et al., 2017	ASI	Vietnam	Lao Cai	Sa Pa, Okui-ho	22.38°N	103.79°E	MFN	Berlin	Liu et al., 2017	Phylogeny of pleasing lacewings
4	Neonallachius ponomarenkoi (Zakharenko, 1991)	ASI	Vietnam	Kien Giang	Tho Tu (=U Minh Thượng district)	9.61°N	105.11°E	ZIN	St.Petersberg	Liu et al., 2017	Phylogeny of pleasing lacewings
5	Neonallachius sinuolatus Li & Liu, 2021	ASI	China	Yunnan	Xishuangbanna, Menglun, Experiment area No. 55	22.62°N	101.35°E	CAU	Beijing	Li & Liu, 2021	First record of the pleasing lacewing subfamily Nallachiinae from China
6	Neonallachius thailandicus Liu & Winterton, 2017	ASI	Thailand	Khon Kaen	Khon Kaen University	16.47°N	102.82°E	EMEC	Berkeley	Liu et al., 2017	Phylogeny of pleasing lacewings
7	Neonallachius sp. (only known female)	ASI	Sri Lanka					SIBS		Hynd, 1992	New items in neuropteran distribution
